# Supplementary material for: A covalent organic cage compound acting as a supramolecular shadow mask for the regioselective functionalization of C60
Source: PubMed Central journal article supplement — Chem Sci. 2020 Jul 7;11(32):8409–15. doi: 10.1039/d0sc03131c (PMC8163405; doi:10.1039/d0sc03131c), 2020-07-07
Supplement: SC-011-D0SC03131C-s001.pdf [file SC-011-D0SC03131C-s001.pdf]

## Supporting Information

### *A Covalent Organic Cage Compound Acting as a Supramolecular Shadow Mask for the Regioselective Functionalization of C<sub>60</sub>*

**Viktoria Leonhardt,<sup>a,b</sup> Stefanie Fimmel,<sup>a</sup> Ana-Maria Krause,<sup>a,b</sup> and Florian Beuerle<sup>a,b,\*</sup>**

<sup>a</sup> Universität Würzburg, Institut für Organische Chemie, Am Hubland, 97074 Würzburg, Germany

<sup>b</sup> Universität Würzburg, Center for Nanosystems Chemistry (CNC) & Bavarian Polymer Institute (BPI), Theodor-Boveri-Weg, 97074 Würzburg, Germany

\*E-mail: [florian.beuerle@uni-wuerzburg.de](mailto:florian.beuerle@uni-wuerzburg.de)

### Content

|          |                                                        |     |
|----------|--------------------------------------------------------|-----|
| <b>1</b> | <b>General Information</b>                             | S2  |
| <b>2</b> | <b>Molecular Modeling</b>                              | S3  |
| <b>3</b> | <b>NMR Spectroscopy</b>                                | S22 |
| <b>4</b> | <b>UV/Vis Absorption Spectroscopy</b>                  | S25 |
| <b>5</b> | <b>Mass Spectrometry</b>                               | S30 |
| <b>6</b> | <b>Crystallographic Data</b>                           | S31 |
| <b>7</b> | <b>Synthesis of <i>N</i>-Methylfulleropyrrolidines</b> | S34 |
| <b>8</b> | <b>References</b>                                      | S47 |

# 1 General Information

## Synthesis and Reagents:

Cages **1**,<sup>S1</sup> **S1**<sup>S2</sup> and TBTQ **S2**<sup>S1</sup> were synthesized as previously reported. C<sub>60</sub> and C<sub>70</sub> were purchased from SOLENNE BV, Netherlands. All chemicals and reagents were purchased from commercial suppliers MERCK, SIGMA-ALDRICH, TCI and were used without further purification. Solvents were purchased from FISHER SCIENTIFIC.

## Technical equipment:

**NMR spectroscopy:** BRUKER AVANCE 400 and BRUKER AVANCE DMX 600. Chemical shifts are indicated in ppm in relation to the particular internal standard (<sup>1</sup>H-NMR: 7.26 ppm for CDCl<sub>3</sub>; <sup>13</sup>C-NMR: 77.16 ppm for CDCl<sub>3</sub>). Processing of the raw data was performed with the program Topspin 3.0.<sup>S3</sup>

**Mass spectroscopy (MALDI):** BRUKER autoflex II. Matrices: DCTB (*trans*-2-(3-(4-*t*-Butylphenyl)-2-methyl-2-propenylidene)malononitrile or TCNQ (Tetracyanoquinodimethane).

**UV/Vis absorption spectroscopy:** JASCO V-670. Samples were measured as CHCl<sub>3</sub> solutions (FISHER SCIENTIFIC) in quartz glass cuvettes (HELLMA) with path lengths of 1 mm, 1 cm or 10 cm.

**Single-Crystal X-ray Diffraction:** BRUKER D8 Quest diffractometer with Photon 100 CMOS APS detector and Montel multilayer optics with Ni-filtered K<sub>α</sub>-radiation ( $\lambda = 1.54060 \text{ \AA}$ ).

**HPLC:** JASCO PU-2080 PLUS pump system, LG 2080-02 ternary gradient unit, DG-2080-53 three-line degasser, and MD-2015 PLUS multiwavelength detector. Column: Nucleosil® (MACHERY-NAGEL). Chromatograms were obtained with toluene/ethyl acetate 2:1 as eluent (HPLC grade from FISHER SCIENTIFIC) and a flow rate of 1.0 mL min<sup>-1</sup>. C<sub>60</sub> derivatives were detected via UV/Vis absorption at 310 nm.

**Flash Chromatography:** INTERCHIM PuriFlash XS 420. Silica gel columns: INTERCHIM PuriFlash PF-15SIHP-F0025, 15  $\mu\text{m}$ , 22 bar. Silica gel conditioning: five column volumes 100 % triethylamine to remove traces of acid, ten column volumes 100 % toluene. Compound separation with toluene and toluene/ethyl acetate 95/5 as eluents.

## 2 Molecular Modeling

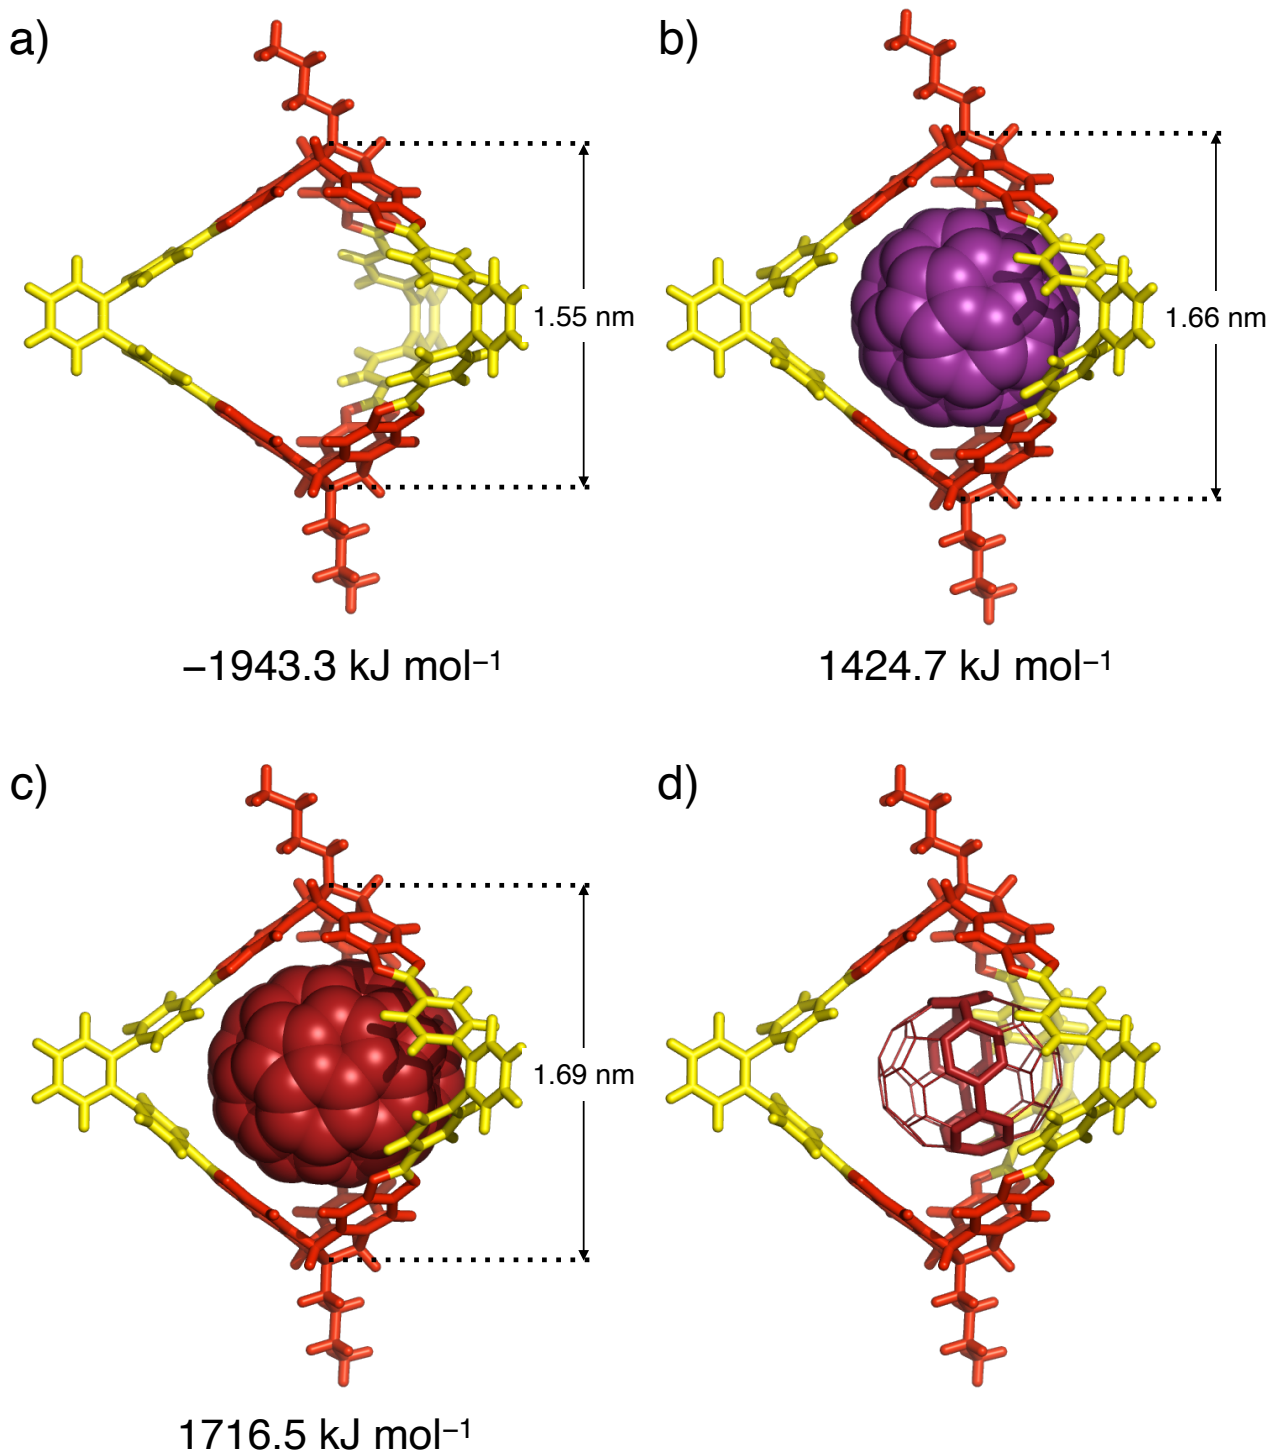

**Fig. S1.** Geometry-optimized molecular structures and heats of formation obtained by semiempirical PM6 modelling with Spartan'18<sup>S4</sup> for a) **1**, b) C<sub>60</sub>@**1**, c) C<sub>70</sub>@**1** and d) positions of the benzenoid hexagons in C<sub>70</sub>@**1**.

**Table S1.** Atomic coordinates for PM6 geometry-optimized model for **1**.

| number | element | x      | y      | z      |
|--------|---------|--------|--------|--------|
| 1      | H       | -4.671 | -0.534 | 4.987  |
| 2      | C       | -5.039 | 0.060  | 4.156  |
| 3      | C       | -6.002 | 1.672  | 1.931  |
| 4      | C       | -4.729 | 1.409  | 4.025  |
| 5      | C       | -5.845 | -0.467 | 3.145  |
| 6      | C       | -6.314 | 0.317  | 2.062  |
| 7      | C       | -5.200 | 2.197  | 2.937  |
| 8      | H       | -6.354 | 2.281  | 1.103  |
| 9      | C       | -7.187 | -0.486 | 1.132  |
| 10     | H       | -8.191 | -0.013 | 1.035  |
| 11     | C       | -7.283 | -1.919 | 1.785  |
| 12     | C       | -6.606 | -2.919 | 0.770  |
| 13     | H       | -7.301 | -3.740 | 0.480  |
| 14     | C       | -8.711 | -2.316 | 2.156  |
| 15     | H       | -8.699 | -3.305 | 2.658  |
| 16     | H       | -9.105 | -1.605 | 2.911  |
| 17     | C       | -5.266 | -2.897 | 2.783  |
| 18     | C       | -3.524 | -4.829 | 1.892  |
| 19     | C       | -5.409 | -3.475 | 1.498  |
| 20     | C       | -4.245 | -3.270 | 3.661  |
| 21     | C       | -3.380 | -4.248 | 3.185  |
| 22     | C       | -4.539 | -4.458 | 1.019  |
| 23     | H       | -4.125 | -2.830 | 4.646  |
| 24     | H       | -4.638 | -4.904 | 0.034  |
| 25     | C       | -6.577 | -0.715 | -0.228 |
| 26     | C       | -5.486 | -1.576 | -2.600 |
| 27     | C       | -6.366 | 0.258  | -1.208 |
| 28     | C       | -6.251 | -2.079 | -0.431 |
| 29     | C       | -5.696 | -2.544 | -1.625 |
| 30     | C       | -5.813 | -0.205 | -2.396 |
| 31     | H       | -6.608 | 1.306  | -1.060 |
| 32     | H       | -5.439 | -3.586 | -1.789 |
| 33     | C       | -6.349 | -1.886 | 3.061  |
| 34     | H       | -6.903 | -2.156 | 3.988  |
| 35     | O       | -5.512 | 0.527  | -3.526 |
| 36     | O       | -4.967 | -1.755 | -3.866 |
| 37     | O       | -2.540 | -5.775 | 1.687  |
| 38     | O       | -2.301 | -4.808 | 3.839  |
| 39     | O       | -3.967 | 2.184  | 4.877  |
| 40     | O       | -4.751 | 3.496  | 3.064  |

|    |   |        |        |         |
|----|---|--------|--------|---------|
| 41 | C | -0.720 | 2.449  | -8.473  |
| 42 | C | 0.827  | 0.195  | -7.841  |
| 43 | C | -0.945 | 1.229  | -9.130  |
| 44 | C | 0.281  | 2.540  | -7.502  |
| 45 | C | 1.050  | 1.415  | -7.197  |
| 46 | C | -0.174 | 0.101  | -8.811  |
| 47 | H | 0.460  | 3.485  | -6.987  |
| 48 | H | -0.359 | -0.844 | -9.319  |
| 49 | H | -1.327 | 3.318  | -8.719  |
| 50 | C | -1.990 | 1.137  | -10.179 |
| 51 | C | -3.921 | 0.978  | -12.205 |
| 52 | C | -1.645 | 1.420  | -11.510 |
| 53 | C | -3.311 | 0.772  | -9.864  |
| 54 | C | -4.272 | 0.695  | -10.884 |
| 55 | C | -2.607 | 1.341  | -12.518 |
| 56 | H | -0.621 | 1.703  | -11.751 |
| 57 | H | -5.295 | 0.412  | -10.638 |
| 58 | H | -2.334 | 1.563  | -13.549 |
| 59 | H | -4.672 | 0.917  | -12.992 |
| 60 | C | -3.715 | 0.466  | -8.471  |
| 61 | C | -4.520 | -0.117 | -5.870  |
| 62 | C | -3.637 | -0.852 | -7.994  |
| 63 | C | -4.189 | 1.492  | -7.639  |
| 64 | C | -4.593 | 1.198  | -6.334  |
| 65 | C | -4.041 | -1.143 | -6.688  |
| 66 | H | -3.260 | -1.642 | -8.641  |
| 67 | H | -4.240 | 2.513  | -8.013  |
| 68 | H | -4.962 | 1.992  | -5.682  |
| 69 | H | -3.981 | -2.166 | -6.311  |
| 70 | H | 1.429  | -0.679 | -7.587  |
| 71 | B | 2.167  | 1.522  | -6.143  |
| 72 | B | -4.985 | -0.443 | -4.439  |
| 73 | C | -2.758 | 7.074  | 4.747   |
| 74 | C | -2.579 | 4.604  | 6.065   |
| 75 | C | -2.054 | 6.967  | 5.956   |
| 76 | C | -3.375 | 5.945  | 4.201   |
| 77 | C | -3.285 | 4.720  | 4.866   |
| 78 | C | -1.961 | 5.731  | 6.614   |
| 79 | H | -3.924 | 6.022  | 3.260   |
| 80 | H | -1.406 | 5.653  | 7.548   |
| 81 | H | -2.820 | 8.034  | 4.238   |
| 82 | C | -1.422 | 8.169  | 6.551   |

|     |   |        |         |       |
|-----|---|--------|---------|-------|
| 83  | C | -0.280 | 10.456  | 7.706 |
| 84  | C | -2.162 | 8.955   | 7.448 |
| 85  | C | -0.101 | 8.534   | 6.232 |
| 86  | C | 0.463  | 9.680   | 6.814 |
| 87  | C | -1.594 | 10.093  | 8.023 |
| 88  | H | -3.185 | 8.670   | 7.693 |
| 89  | H | 1.486  | 9.960   | 6.566 |
| 90  | H | -2.173 | 10.698  | 8.718 |
| 91  | H | 0.163  | 11.343  | 8.154 |
| 92  | C | 0.714  | 7.730   | 5.290 |
| 93  | C | 2.285  | 6.253   | 3.529 |
| 94  | C | 1.507  | 6.678   | 5.775 |
| 95  | C | 0.704  | 8.035   | 3.920 |
| 96  | C | 1.492  | 7.292   | 3.037 |
| 97  | C | 2.295  | 5.937   | 4.890 |
| 98  | H | 1.505  | 6.442   | 6.837 |
| 99  | H | 0.081  | 8.847   | 3.550 |
| 100 | H | 1.487  | 7.524   | 1.971 |
| 101 | H | 2.913  | 5.118   | 5.260 |
| 102 | H | -2.509 | 3.639   | 6.571 |
| 103 | B | -3.984 | 3.483   | 4.274 |
| 104 | B | 3.171  | 5.449   | 2.559 |
| 105 | C | 1.176  | -7.425  | 4.662 |
| 106 | C | -0.156 | -7.576  | 2.197 |
| 107 | C | 1.594  | -8.344  | 3.687 |
| 108 | C | 0.089  | -6.585  | 4.404 |
| 109 | C | -0.571 | -6.670  | 3.176 |
| 110 | C | 0.930  | -8.417  | 2.453 |
| 111 | H | -0.240 | -5.868  | 5.157 |
| 112 | H | 1.265  | -9.126  | 1.698 |
| 113 | H | 1.699  | -7.368  | 5.614 |
| 114 | C | 2.730  | -9.254  | 3.970 |
| 115 | C | 4.838  | -11.017 | 4.527 |
| 116 | C | 2.474  | -10.499 | 4.565 |
| 117 | C | 4.052  | -8.892  | 3.653 |
| 118 | C | 5.102  | -9.780  | 3.935 |
| 119 | C | 3.523  | -11.376 | 4.842 |
| 120 | H | 1.449  | -10.777 | 4.809 |
| 121 | H | 6.125  | -9.499  | 3.689 |
| 122 | H | 3.318  | -12.341 | 5.304 |
| 123 | H | 5.657  | -11.701 | 4.744 |
| 124 | C | 4.364  | -7.587  | 3.024 |

|     |   |        |        |        |
|-----|---|--------|--------|--------|
| 125 | C | 5.000  | -5.146 | 1.844  |
| 126 | C | 4.391  | -7.473 | 1.626  |
| 127 | C | 4.649  | -6.473 | 3.830  |
| 128 | C | 4.967  | -5.249 | 3.236  |
| 129 | C | 4.709  | -6.247 | 1.034  |
| 130 | H | 4.161  | -8.338 | 1.006  |
| 131 | H | 4.619  | -6.566 | 4.914  |
| 132 | H | 5.189  | -4.380 | 3.858  |
| 133 | H | 4.730  | -6.152 | -0.053 |
| 134 | H | -0.675 | -7.627 | 1.239  |
| 135 | B | -1.782 | -5.759 | 2.901  |
| 136 | B | 5.372  | -3.802 | 1.192  |
| 137 | C | 6.610  | 0.354  | -0.049 |
| 138 | C | 5.836  | -2.268 | -0.342 |
| 139 | C | 6.376  | -0.363 | 1.126  |
| 140 | C | 6.460  | -0.227 | -1.334 |
| 141 | C | 6.068  | -1.556 | -1.512 |
| 142 | C | 5.986  | -1.685 | 0.949  |
| 143 | H | 6.484  | 0.074  | 2.114  |
| 144 | H | 5.947  | -2.008 | -2.491 |
| 145 | C | 7.069  | 1.787  | -0.138 |
| 146 | H | 8.017  | 1.930  | 0.429  |
| 147 | C | 6.802  | 0.752  | -2.428 |
| 148 | H | 7.610  | 0.344  | -3.079 |
| 149 | C | 7.270  | 2.060  | -1.679 |
| 150 | C | 6.230  | 3.186  | -2.067 |
| 151 | H | 6.728  | 4.070  | -2.524 |
| 152 | C | 6.032  | 2.785  | 0.310  |
| 153 | C | 4.166  | 4.767  | 0.698  |
| 154 | C | 5.562  | 3.571  | -0.772 |
| 155 | C | 5.580  | 2.969  | 1.619  |
| 156 | C | 4.638  | 3.977  | 1.786  |
| 157 | C | 4.615  | 4.584  | -0.604 |
| 158 | H | 5.931  | 2.370  | 2.453  |
| 159 | H | 4.246  | 5.188  | -1.427 |
| 160 | C | 5.618  | 1.172  | -3.260 |
| 161 | C | 3.551  | 2.363  | -4.628 |
| 162 | C | 4.912  | 0.362  | -4.153 |
| 163 | C | 5.298  | 2.538  | -3.059 |
| 164 | C | 4.254  | 3.169  | -3.740 |
| 165 | C | 3.873  | 0.990  | -4.830 |
| 166 | H | 5.147  | -0.686 | -4.310 |

|     |   |         |        |        |
|-----|---|---------|--------|--------|
| 167 | H | 3.998   | 4.213  | -3.590 |
| 168 | O | 4.035   | 4.379  | 2.960  |
| 169 | O | 3.249   | 5.694  | 1.150  |
| 170 | O | 5.704   | -2.618 | 1.926  |
| 171 | O | 5.453   | -3.589 | -0.223 |
| 172 | O | 2.490   | 2.724  | -5.434 |
| 173 | O | 3.026   | 0.438  | -5.769 |
| 174 | C | -9.666  | -2.365 | 0.956  |
| 175 | H | -9.288  | -3.077 | 0.196  |
| 176 | H | -9.694  | -1.381 | 0.449  |
| 177 | C | -11.084 | -2.769 | 1.386  |
| 178 | H | -11.060 | -3.756 | 1.888  |
| 179 | H | -11.467 | -2.055 | 2.141  |
| 180 | C | -12.038 | -2.820 | 0.196  |
| 181 | H | -11.710 | -3.547 | -0.556 |
| 182 | H | -12.117 | -1.847 | -0.303 |
| 183 | H | -13.048 | -3.109 | 0.510  |
| 184 | C | 8.696   | 2.478  | -2.034 |
| 185 | H | 8.939   | 3.428  | -1.516 |
| 186 | H | 8.752   | 2.709  | -3.118 |
| 187 | C | 9.752   | 1.421  | -1.683 |
| 188 | H | 9.527   | 0.469  | -2.203 |
| 189 | H | 9.709   | 1.182  | -0.602 |
| 190 | C | 11.163  | 1.896  | -2.054 |
| 191 | H | 11.394  | 2.844  | -1.529 |
| 192 | H | 11.211  | 2.131  | -3.136 |
| 193 | C | 12.218  | 0.847  | -1.710 |
| 194 | H | 13.223  | 1.193  | -1.977 |
| 195 | H | 12.043  | -0.094 | -2.244 |
| 196 | H | 12.226  | 0.618  | -0.638 |

**Table S2.** Atomic coordinates for PM6 geometry-optimized model for  $C_{60}C_1$ .

| number | element | x     | y      | z     |
|--------|---------|-------|--------|-------|
| 1      | C       | 3.334 | -3.738 | 6.610 |
| 2      | C       | 3.504 | -2.169 | 6.634 |
| 3      | C       | 4.005 | -4.235 | 5.267 |
| 4      | C       | 1.787 | -4.015 | 6.457 |
| 5      | C       | 2.881 | -4.840 | 4.464 |
| 6      | C       | 1.636 | -4.707 | 5.127 |
| 7      | C       | 2.100 | -1.621 | 6.616 |
| 8      | C       | 1.137 | -2.656 | 6.509 |



|    |   |        |        |        |
|----|---|--------|--------|--------|
| 9  | C | 3.003  | -5.461 | 3.218  |
| 10 | C | 1.814  | -5.922 | 2.665  |
| 11 | C | 0.561  | -5.780 | 3.327  |
| 12 | C | 0.443  | -5.181 | 4.575  |
| 13 | H | -0.517 | -5.080 | 5.073  |
| 14 | C | -0.235 | -2.397 | 6.466  |
| 15 | H | -0.980 | -3.182 | 6.380  |
| 16 | C | -0.590 | -1.054 | 6.525  |
| 17 | C | 0.377  | -0.015 | 6.642  |
| 18 | C | 1.742  | -0.273 | 6.695  |
| 19 | H | 2.472  | 0.526  | 6.780  |
| 20 | O | -1.859 | -0.515 | 6.461  |
| 21 | O | -0.249 | 1.215  | 6.661  |
| 22 | C | 4.582  | -2.995 | 4.632  |
| 23 | C | 4.292  | -1.836 | 5.393  |
| 24 | C | 5.312  | -2.945 | 3.441  |
| 25 | H | 5.540  | -3.828 | 2.852  |
| 26 | C | 5.717  | -1.676 | 3.045  |
| 27 | C | 5.417  | -0.509 | 3.805  |
| 28 | C | 4.708  | -0.561 | 5.000  |
| 29 | H | 4.487  | 0.334  | 5.573  |
| 30 | O | 6.412  | -1.331 | 1.903  |
| 31 | H | 1.405  | -4.664 | 7.279  |
| 32 | H | 4.803  | -4.987 | 5.455  |
| 33 | H | 4.048  | -1.831 | 7.545  |
| 34 | O | 5.907  | 0.611  | 3.165  |
| 35 | O | 1.636  | -6.533 | 1.440  |
| 36 | C | 3.950  | -4.428 | 7.826  |
| 37 | H | 3.844  | -5.527 | 7.717  |
| 38 | H | 5.043  | -4.237 | 7.841  |
| 39 | H | 3.953  | -5.569 | 2.704  |
| 40 | O | -0.451 | -6.293 | 2.540  |
| 41 | C | 3.337  | -3.987 | 9.161  |
| 42 | H | 2.246  | -4.179 | 9.163  |
| 43 | H | 3.442  | -2.891 | 9.286  |
| 44 | C | 3.994  | -4.711 | 10.344 |
| 45 | H | 5.084  | -4.515 | 10.349 |
| 46 | H | 3.884  | -5.807 | 10.225 |
| 47 | C | 3.387  | -4.275 | 11.676 |
| 48 | H | 3.861  | -4.796 | 12.516 |
| 49 | H | 2.313  | -4.490 | 11.722 |
| 50 | H | 3.512  | -3.200 | 11.846 |

|    |   |        |        |        |
|----|---|--------|--------|--------|
| 51 | C | -3.360 | 3.611  | -6.651 |
| 52 | C | -4.439 | 2.793  | -5.835 |
| 53 | C | -2.212 | 2.588  | -7.011 |
| 54 | C | -2.732 | 4.645  | -5.638 |
| 55 | C | -0.984 | 3.112  | -6.310 |
| 56 | C | -1.273 | 4.273  | -5.550 |
| 57 | C | -4.448 | 3.412  | -4.460 |
| 58 | C | -3.482 | 4.442  | -4.346 |
| 59 | C | 0.300  | 2.566  | -6.379 |
| 60 | C | 1.271  | 3.235  | -5.643 |
| 61 | C | 0.983  | 4.408  | -4.889 |
| 62 | C | -0.293 | 4.956  | -4.827 |
| 63 | H | -0.504 | 5.847  | -4.244 |
| 64 | C | -3.287 | 5.154  | -3.160 |
| 65 | H | -2.545 | 5.941  | -3.059 |
| 66 | C | -4.100 | 4.776  | -2.098 |
| 67 | C | -5.079 | 3.748  | -2.216 |
| 68 | C | -5.279 | 3.046  | -3.399 |
| 69 | H | -6.023 | 2.259  | -3.478 |
| 70 | O | -4.092 | 5.274  | -0.811 |
| 71 | O | -5.727 | 3.570  | -1.010 |
| 72 | C | -2.688 | 1.256  | -6.488 |
| 73 | C | -3.942 | 1.370  | -5.838 |
| 74 | C | -2.019 | 0.036  | -6.611 |
| 75 | H | -1.056 | -0.060 | -7.103 |
| 76 | C | -2.662 | -1.056 | -6.040 |
| 77 | C | -3.926 | -0.943 | -5.393 |
| 78 | C | -4.598 | 0.269  | -5.281 |
| 79 | H | -5.558 | 0.346  | -4.782 |
| 80 | O | -2.213 | -2.359 | -5.976 |
| 81 | H | -2.850 | 5.693  | -5.997 |
| 82 | H | -2.043 | 2.536  | -8.111 |
| 83 | H | -5.448 | 2.857  | -6.300 |
| 84 | O | -4.319 | -2.172 | -4.905 |
| 85 | O | 2.601  | 2.893  | -5.496 |
| 86 | C | -3.979 | 4.274  | -7.880 |
| 87 | H | -4.448 | 3.498  | -8.519 |
| 88 | H | -4.811 | 4.936  | -7.560 |
| 89 | H | 0.531  | 1.675  | -6.954 |
| 90 | O | 2.123  | 4.851  | -4.248 |
| 91 | C | -2.976 | 5.083  | -8.713 |
| 92 | H | -2.144 | 4.432  | -9.047 |

|     |   |        |        |         |
|-----|---|--------|--------|---------|
| 93  | H | -2.504 | 5.867  | -8.089  |
| 94  | C | -3.652 | 5.726  | -9.932  |
| 95  | H | -4.481 | 6.383  | -9.602  |
| 96  | H | -4.120 | 4.944  | -10.562 |
| 97  | C | -2.659 | 6.532  | -10.765 |
| 98  | H | -3.148 | 6.988  | -11.633 |
| 99  | H | -1.843 | 5.905  | -11.142 |
| 100 | H | -2.205 | 7.342  | -10.183 |
| 101 | C | 8.685  | 4.118  | -2.973  |
| 102 | C | 11.442 | 4.345  | -2.488  |
| 103 | C | 9.269  | 3.421  | -1.902  |
| 104 | C | 9.491  | 4.931  | -3.791  |
| 105 | C | 10.860 | 5.044  | -3.551  |
| 106 | C | 10.651 | 3.539  | -1.670  |
| 107 | H | 9.037  | 5.471  | -4.622  |
| 108 | H | 11.475 | 5.675  | -4.190  |
| 109 | H | 11.102 | 2.997  | -0.838  |
| 110 | H | 12.511 | 4.431  | -2.299  |
| 111 | C | 7.243  | 4.024  | -3.302  |
| 112 | C | 4.579  | 3.926  | -4.112  |
| 113 | C | 6.723  | 2.844  | -3.856  |
| 114 | C | 6.414  | 5.143  | -3.123  |
| 115 | C | 5.076  | 5.091  | -3.524  |
| 116 | C | 5.388  | 2.798  | -4.268  |
| 117 | H | 7.363  | 1.970  | -3.970  |
| 118 | H | 6.816  | 6.050  | -2.675  |
| 119 | H | 4.428  | 5.958  | -3.384  |
| 120 | H | 4.984  | 1.887  | -4.714  |
| 121 | C | 8.486  | 2.567  | -0.978  |
| 122 | C | 7.179  | 0.972  | 0.896   |
| 123 | C | 8.659  | 1.174  | -1.000  |
| 124 | C | 7.626  | 3.155  | -0.037  |
| 125 | C | 6.976  | 2.354  | 0.908   |
| 126 | C | 8.000  | 0.374  | -0.063  |
| 127 | H | 9.312  | 0.720  | -1.744  |
| 128 | H | 7.474  | 4.233  | -0.040  |
| 129 | H | 6.320  | 2.809  | 1.652   |
| 130 | H | 8.131  | -0.709 | -0.077  |
| 131 | B | 3.122  | 3.890  | -4.609  |
| 132 | B | 6.505  | 0.097  | 1.969   |
| 133 | C | -6.562 | 5.361  | 5.417   |
| 134 | C | -7.438 | 6.047  | 7.995   |

|     |   |        |         |        |
|-----|---|--------|---------|--------|
| 135 | C | -5.936 | 4.802   | 6.543  |
| 136 | C | -7.631 | 6.258   | 5.593  |
| 137 | C | -8.067 | 6.600   | 6.873  |
| 138 | C | -6.380 | 5.154   | 7.830  |
| 139 | H | -8.116 | 6.690   | 4.718  |
| 140 | H | -8.894 | 7.296   | 6.999  |
| 141 | H | -5.892 | 4.720   | 8.702  |
| 142 | H | -7.776 | 6.314   | 8.995  |
| 143 | C | -6.135 | 5.062   | 4.030  |
| 144 | C | -5.444 | 4.672   | 1.359  |
| 145 | C | -4.944 | 5.609   | 3.528  |
| 146 | C | -6.961 | 4.288   | 3.197  |
| 147 | C | -6.611 | 4.090   | 1.859  |
| 148 | C | -4.601 | 5.418   | 2.186  |
| 149 | H | -4.294 | 6.186   | 4.183  |
| 150 | H | -7.874 | 3.849   | 3.596  |
| 151 | H | -7.249 | 3.488   | 1.209  |
| 152 | H | -3.684 | 5.855   | 1.788  |
| 153 | C | -4.823 | 3.828   | 6.442  |
| 154 | C | -2.765 | 1.950   | 6.457  |
| 155 | C | -3.520 | 4.218   | 6.793  |
| 156 | C | -5.083 | 2.501   | 6.063  |
| 157 | C | -4.051 | 1.559   | 6.078  |
| 158 | C | -2.488 | 3.276   | 6.796  |
| 159 | H | -3.319 | 5.252   | 7.068  |
| 160 | H | -6.089 | 2.209   | 5.768  |
| 161 | H | -4.252 | 0.523   | 5.800  |
| 162 | H | -1.474 | 3.575   | 7.068  |
| 163 | B | -5.092 | 4.505   | -0.131 |
| 164 | B | -1.640 | 0.900   | 6.521  |
| 165 | C | -3.115 | -8.742  | -4.141 |
| 166 | C | -3.144 | -11.542 | -3.926 |
| 167 | C | -2.475 | -9.369  | -3.060 |
| 168 | C | -3.772 | -9.526  | -5.107 |
| 169 | C | -3.787 | -10.916 | -5.001 |
| 170 | C | -2.493 | -10.772 | -2.963 |
| 171 | H | -4.268 | -9.038  | -5.945 |
| 172 | H | -4.298 | -11.515 | -5.753 |
| 173 | H | -1.995 | -11.257 | -2.122 |
| 174 | H | -3.154 | -12.627 | -3.842 |
| 175 | C | -3.118 | -7.272  | -4.330 |
| 176 | C | -3.185 | -4.543  | -4.887 |

|     |   |        |        |        |
|-----|---|--------|--------|--------|
| 177 | C | -4.308 | -6.548 | -4.148 |
| 178 | C | -1.953 | -6.616 | -4.757 |
| 179 | C | -1.989 | -5.248 | -5.043 |
| 180 | C | -4.339 | -5.179 | -4.424 |
| 181 | H | -5.204 | -7.058 | -3.798 |
| 182 | H | -1.026 | -7.176 | -4.873 |
| 183 | H | -1.090 | -4.737 | -5.390 |
| 184 | H | -5.261 | -4.613 | -4.283 |
| 185 | C | -1.785 | -8.614 | -1.987 |
| 186 | C | -0.491 | -7.374 | 0.146  |
| 187 | C | -2.533 | -7.924 | -1.020 |
| 188 | C | -0.383 | -8.648 | -1.901 |
| 189 | C | 0.265  | -8.022 | -0.833 |
| 190 | C | -1.883 | -7.308 | 0.053  |
| 191 | H | -3.618 | -7.879 | -1.105 |
| 192 | H | 0.194  | -9.167 | -2.664 |
| 193 | H | 1.353  | -8.045 | -0.763 |
| 194 | H | -2.463 | -6.785 | 0.816  |
| 195 | B | -3.238 | -3.046 | -5.248 |
| 196 | B | 0.221  | -6.739 | 1.356  |
| 197 | C | -1.575 | 2.561  | -1.892 |
| 198 | C | -1.312 | 3.218  | -0.604 |
| 199 | C | -2.024 | 2.842  | 0.523  |
| 200 | C | -3.043 | 1.787  | 0.430  |
| 201 | C | -3.290 | 1.167  | -0.784 |
| 202 | C | -2.535 | 1.566  | -1.979 |
| 203 | C | 0.132  | 3.472  | -0.512 |
| 204 | C | -1.334 | 2.696  | 1.811  |
| 205 | C | -2.982 | 0.988  | 1.661  |
| 206 | C | -3.494 | -0.286 | -0.841 |
| 207 | C | -2.272 | 0.361  | -2.773 |
| 208 | C | -0.295 | 2.409  | -2.594 |
| 209 | C | -3.437 | -1.039 | 0.320  |
| 210 | C | -3.173 | -0.383 | 1.607  |
| 211 | C | -2.748 | -2.336 | 0.319  |
| 212 | C | -2.320 | -1.275 | 2.403  |
| 213 | C | 0.783  | 3.335  | 0.703  |
| 214 | C | -2.058 | -2.482 | 1.607  |
| 215 | C | 0.028  | 2.935  | 1.898  |
| 216 | C | -1.064 | 0.218  | -3.436 |
| 217 | C | -0.047 | 1.272  | -3.344 |
| 218 | C | 0.761  | 2.972  | -1.742 |

|     |   |        |        |        |
|-----|---|--------|--------|--------|
| 219 | C | -0.375 | -1.079 | -3.437 |
| 220 | C | 2.005  | 2.366  | -1.689 |
| 221 | C | -1.324 | -0.745 | 3.206  |
| 222 | C | 0.881  | 2.043  | 2.694  |
| 223 | C | 1.069  | -0.826 | -3.346 |
| 224 | C | 3.384  | 0.922  | -0.401 |
| 225 | C | 2.162  | 1.891  | 1.990  |
| 226 | C | 0.322  | 0.962  | 3.356  |
| 227 | C | 1.011  | -0.335 | 3.355  |
| 228 | C | 3.121  | 0.266  | -1.689 |
| 229 | C | 2.929  | -1.105 | -1.742 |
| 230 | C | 2.989  | -1.903 | -0.511 |
| 231 | C | 1.873  | -1.667 | -2.595 |
| 232 | C | -2.155 | -2.807 | -0.841 |
| 233 | C | 2.219  | -0.478 | 2.693  |
| 234 | C | -0.934 | -2.161 | -2.775 |
| 235 | C | -0.081 | -3.053 | -1.979 |
| 236 | C | 2.811  | 0.668  | 1.989  |
| 237 | C | -0.006 | -1.389 | 3.263  |
| 238 | C | 0.242  | -2.527 | 2.513  |
| 239 | C | 3.442  | 0.169  | 0.760  |
| 240 | C | 3.237  | -1.284 | 0.703  |
| 241 | C | 1.281  | -2.813 | -1.892 |
| 242 | C | 1.971  | -2.959 | -0.604 |
| 243 | C | -0.836 | -3.452 | -0.784 |
| 244 | C | -0.814 | -3.089 | 1.660  |
| 245 | C | -0.185 | -3.590 | 0.431  |
| 246 | C | 1.259  | -3.334 | 0.523  |
| 247 | C | 1.522  | -2.678 | 1.810  |
| 248 | C | 2.482  | -1.684 | 1.898  |
| 249 | C | 2.695  | 2.220  | -0.401 |
| 250 | C | 2.101  | 2.690  | 0.759  |
| 251 | C | -1.926 | 1.550  | 2.514  |
| 252 | C | -1.122 | 0.709  | 3.265  |
| 253 | C | 1.272  | 0.628  | -3.288 |
| 254 | C | 2.268  | 1.159  | -2.485 |
| 255 | C | -2.215 | -2.009 | -2.072 |
| 256 | C | -2.864 | -0.785 | -2.071 |

**Table S3.** Atomic coordinates for PM6 geometry-optimized model for C<sub>70</sub>C<sub>1</sub>.

| number | element | x      | y      | z     |
|--------|---------|--------|--------|-------|
| 1      | C       | 3.348  | -3.795 | 6.792 |
| 2      | C       | 3.516  | -2.225 | 6.789 |
| 3      | C       | 4.062  | -4.321 | 5.484 |
| 4      | C       | 1.806  | -4.073 | 6.597 |
| 5      | C       | 2.962  | -4.941 | 4.657 |
| 6      | C       | 1.694  | -4.771 | 5.266 |
| 7      | C       | 2.112  | -1.678 | 6.746 |
| 8      | C       | 1.153  | -2.715 | 6.631 |
| 9      | C       | 3.122  | -5.595 | 3.433 |
| 10     | C       | 1.946  | -6.033 | 2.834 |
| 11     | C       | 0.668  | -5.831 | 3.430 |
| 12     | C       | 0.513  | -5.214 | 4.666 |
| 13     | H       | -0.465 | -5.075 | 5.117 |
| 14     | C       | -0.219 | -2.459 | 6.574 |
| 15     | H       | -0.962 | -3.245 | 6.483 |
| 16     | C       | -0.577 | -1.117 | 6.627 |
| 17     | C       | 0.386  | -0.075 | 6.750 |
| 18     | C       | 1.751  | -0.330 | 6.818 |
| 19     | H       | 2.478  | 0.470  | 6.909 |
| 20     | O       | -1.847 | -0.580 | 6.547 |
| 21     | O       | -0.243 | 1.153  | 6.758 |
| 22     | C       | 4.651  | -3.093 | 4.835 |
| 23     | C       | 4.322  | -1.915 | 5.552 |
| 24     | C       | 5.415  | -3.065 | 3.665 |
| 25     | H       | 5.678  | -3.962 | 3.113 |
| 26     | C       | 5.800  | -1.801 | 3.235 |
| 27     | C       | 5.446  | -0.616 | 3.942 |
| 28     | C       | 4.715  | -0.645 | 5.123 |
| 29     | H       | 4.457  | 0.263  | 5.659 |
| 30     | O       | 6.503  | -1.477 | 2.092 |
| 31     | H       | 1.403  | -4.722 | 7.409 |
| 32     | H       | 4.855  | -5.067 | 5.712 |
| 33     | H       | 4.051  | -1.869 | 7.699 |
| 34     | O       | 5.900  | 0.495  | 3.260 |
| 35     | O       | 1.803  | -6.650 | 1.607 |
| 36     | C       | 3.924  | -4.458 | 8.042 |
| 37     | H       | 3.821  | -5.559 | 7.954 |
| 38     | H       | 5.016  | -4.267 | 8.089 |
| 39     | H       | 4.090  | -5.740 | 2.964 |
| 40     | O       | -0.324 | -6.295 | 2.591 |

|    |   |        |        |        |
|----|---|--------|--------|--------|
| 41 | C | 3.268  | -3.987 | 9.347  |
| 42 | H | 2.178  | -4.180 | 9.318  |
| 43 | H | 3.370  | -2.889 | 9.453  |
| 44 | C | 3.887  | -4.686 | 10.566 |
| 45 | H | 4.977  | -4.490 | 10.602 |
| 46 | H | 3.780  | -5.784 | 10.468 |
| 47 | C | 3.238  | -4.221 | 11.868 |
| 48 | H | 3.685  | -4.724 | 12.734 |
| 49 | H | 2.163  | -4.435 | 11.884 |
| 50 | H | 3.359  | -3.142 | 12.018 |
| 51 | C | -3.573 | 3.827  | -6.648 |
| 52 | C | -4.627 | 2.978  | -5.829 |
| 53 | C | -2.435 | 2.824  | -7.078 |
| 54 | C | -2.921 | 4.829  | -5.617 |
| 55 | C | -1.190 | 3.323  | -6.388 |
| 56 | C | -1.465 | 4.437  | -5.555 |
| 57 | C | -4.633 | 3.583  | -4.448 |
| 58 | C | -3.667 | 4.612  | -4.325 |
| 59 | C | 0.092  | 2.784  | -6.514 |
| 60 | C | 1.075  | 3.398  | -5.746 |
| 61 | C | 0.797  | 4.510  | -4.901 |
| 62 | C | -0.475 | 5.063  | -4.794 |
| 63 | H | -0.676 | 5.911  | -4.148 |
| 64 | C | -3.475 | 5.316  | -3.133 |
| 65 | H | -2.734 | 6.101  | -3.026 |
| 66 | C | -4.290 | 4.929  | -2.076 |
| 67 | C | -5.271 | 3.904  | -2.204 |
| 68 | C | -5.469 | 3.211  | -3.392 |
| 69 | H | -6.214 | 2.426  | -3.478 |
| 70 | O | -4.272 | 5.406  | -0.780 |
| 71 | O | -5.911 | 3.708  | -0.997 |
| 72 | C | -2.883 | 1.475  | -6.574 |
| 73 | C | -4.104 | 1.563  | -5.860 |
| 74 | C | -2.208 | 0.265  | -6.752 |
| 75 | H | -1.275 | 0.186  | -7.301 |
| 76 | C | -2.802 | -0.842 | -6.156 |
| 77 | C | -4.022 | -0.751 | -5.427 |
| 78 | C | -4.707 | 0.449  | -5.272 |
| 79 | H | -5.638 | 0.508  | -4.715 |
| 80 | O | -2.327 | -2.137 | -6.124 |
| 81 | H | -3.025 | 5.886  | -5.953 |
| 82 | H | -2.297 | 2.807  | -8.183 |



|     |   |        |        |         |
|-----|---|--------|--------|---------|
| 83  | H | -5.642 | 3.026  | -6.283  |
| 84  | O | -4.355 | -1.985 | -4.905  |
| 85  | O | 2.403  | 3.039  | -5.634  |
| 86  | C | -4.232 | 4.532  | -7.833  |
| 87  | H | -4.715 | 3.777  | -8.487  |
| 88  | H | -5.058 | 5.175  | -7.464  |
| 89  | H | 0.314  | 1.934  | -7.152  |
| 90  | O | 1.939  | 4.886  | -4.223  |
| 91  | C | -3.259 | 5.378  | -8.664  |
| 92  | H | -2.433 | 4.746  | -9.047  |
| 93  | H | -2.773 | 6.141  | -8.024  |
| 94  | C | -3.975 | 6.064  | -9.836  |
| 95  | H | -4.798 | 6.701  | -9.456  |
| 96  | H | -4.456 | 5.303  | -10.482 |
| 97  | C | -3.012 | 6.908  | -10.666 |
| 98  | H | -3.530 | 7.394  | -11.501 |
| 99  | H | -2.204 | 6.302  | -11.092 |
| 100 | H | -2.545 | 7.699  | -10.066 |
| 101 | C | 8.490  | 3.943  | -3.005  |
| 102 | C | 11.264 | 4.125  | -2.598  |
| 103 | C | 9.091  | 3.234  | -1.953  |
| 104 | C | 9.287  | 4.744  | -3.845  |
| 105 | C | 10.663 | 4.836  | -3.644  |
| 106 | C | 10.483 | 3.331  | -1.760  |
| 107 | H | 8.818  | 5.293  | -4.661  |
| 108 | H | 11.270 | 5.458  | -4.300  |
| 109 | H | 10.948 | 2.780  | -0.942  |
| 110 | H | 12.339 | 4.193  | -2.439  |
| 111 | C | 7.040  | 3.886  | -3.310  |
| 112 | C | 4.379  | 3.906  | -4.136  |
| 113 | C | 6.507  | 2.774  | -3.981  |
| 114 | C | 6.222  | 4.987  | -3.012  |
| 115 | C | 4.886  | 4.995  | -3.424  |
| 116 | C | 5.174  | 2.788  | -4.401  |
| 117 | H | 7.137  | 1.909  | -4.184  |
| 118 | H | 6.633  | 5.837  | -2.471  |
| 119 | H | 4.248  | 5.850  | -3.197  |
| 120 | H | 4.761  | 1.933  | -4.939  |
| 121 | C | 8.335  | 2.390  | -0.998  |
| 122 | C | 7.139  | 0.816  | 0.968   |
| 123 | C | 8.530  | 0.998  | -0.997  |
| 124 | C | 7.501  | 2.983  | -0.037  |

|     |   |        |         |        |
|-----|---|--------|---------|--------|
| 125 | C | 6.907  | 2.193   | 0.952  |
| 126 | C | 7.927  | 0.210   | -0.013 |
| 127 | H | 9.158  | 0.539   | -1.758 |
| 128 | H | 7.327  | 4.058   | -0.059 |
| 129 | H | 6.273  | 2.654   | 1.712  |
| 130 | H | 8.078  | -0.871  | -0.009 |
| 131 | B | 2.927  | 3.942   | -4.653 |
| 132 | B | 6.524  | -0.044  | 2.088  |
| 133 | C | -6.586 | 5.297   | 5.505  |
| 134 | C | -7.422 | 5.937   | 8.109  |
| 135 | C | -5.936 | 4.725   | 6.610  |
| 136 | C | -7.658 | 6.185   | 5.716  |
| 137 | C | -8.074 | 6.503   | 7.007  |
| 138 | C | -6.362 | 5.055   | 7.910  |
| 139 | H | -8.161 | 6.629   | 4.856  |
| 140 | H | -8.903 | 7.192   | 7.159  |
| 141 | H | -5.856 | 4.609   | 8.767  |
| 142 | H | -7.744 | 6.185   | 9.119  |
| 143 | C | -6.189 | 5.032   | 4.102  |
| 144 | C | -5.576 | 4.738   | 1.399  |
| 145 | C | -5.001 | 5.577   | 3.590  |
| 146 | C | -7.048 | 4.304   | 3.262  |
| 147 | C | -6.738 | 4.153   | 1.908  |
| 148 | C | -4.698 | 5.435   | 2.233  |
| 149 | H | -4.324 | 6.117   | 4.250  |
| 150 | H | -7.958 | 3.864   | 3.667  |
| 151 | H | -7.402 | 3.588   | 1.253  |
| 152 | H | -3.783 | 5.871   | 1.828  |
| 153 | C | -4.818 | 3.759   | 6.487  |
| 154 | C | -2.756 | 1.885   | 6.514  |
| 155 | C | -3.517 | 4.153   | 6.840  |
| 156 | C | -5.072 | 2.433   | 6.103  |
| 157 | C | -4.039 | 1.492   | 6.124  |
| 158 | C | -2.483 | 3.213   | 6.849  |
| 159 | H | -3.319 | 5.188   | 7.114  |
| 160 | H | -6.076 | 2.138   | 5.802  |
| 161 | H | -4.236 | 0.456   | 5.845  |
| 162 | H | -1.471 | 3.514   | 7.125  |
| 163 | B | -5.261 | 4.620   | -0.104 |
| 164 | B | -1.630 | 0.836   | 6.598  |
| 165 | C | -2.910 | -8.520  | -4.200 |
| 166 | C | -2.872 | -11.326 | -4.077 |

|     |   |        |         |        |
|-----|---|--------|---------|--------|
| 167 | C | -2.247 | -9.165  | -3.144 |
| 168 | C | -3.555 | -9.290  | -5.186 |
| 169 | C | -3.538 | -10.682 | -5.127 |
| 170 | C | -2.232 | -10.572 | -3.095 |
| 171 | H | -4.069 | -8.786  | -6.005 |
| 172 | H | -4.040 | -11.267 | -5.895 |
| 173 | H | -1.718 | -11.073 | -2.274 |
| 174 | H | -2.856 | -12.413 | -4.028 |
| 175 | C | -2.960 | -7.047  | -4.360 |
| 176 | C | -3.153 | -4.325  | -4.930 |
| 177 | C | -4.156 | -6.358  | -4.099 |
| 178 | C | -1.846 | -6.356  | -4.863 |
| 179 | C | -1.946 | -4.993  | -5.155 |
| 180 | C | -4.251 | -4.993  | -4.382 |
| 181 | H | -5.010 | -6.892  | -3.687 |
| 182 | H | -0.911 | -6.888  | -5.036 |
| 183 | H | -1.088 | -4.456  | -5.564 |
| 184 | H | -5.179 | -4.455  | -4.184 |
| 185 | C | -1.565 | -8.445  | -2.042 |
| 186 | C | -0.301 | -7.331  | 0.179  |
| 187 | C | -2.311 | -7.714  | -1.105 |
| 188 | C | -0.174 | -8.574  | -1.886 |
| 189 | C | 0.459  | -8.012  | -0.775 |
| 190 | C | -1.678 | -7.163  | 0.012  |
| 191 | H | -3.384 | -7.589  | -1.245 |
| 192 | H | 0.406  | -9.118  | -2.629 |
| 193 | H | 1.538  | -8.112  | -0.650 |
| 194 | H | -2.258 | -6.610  | 0.753  |
| 195 | B | -3.276 | -2.837  | -5.310 |
| 196 | B | 0.385  | -6.766  | 1.438  |
| 197 | C | 0.238  | -1.012  | -3.950 |
| 198 | C | 0.524  | -2.381  | -3.516 |
| 199 | C | 1.783  | -2.710  | -3.034 |
| 200 | C | 2.829  | -1.681  | -2.969 |
| 201 | C | 2.550  | -0.388  | -3.388 |
| 202 | C | 1.217  | -0.049  | -3.889 |
| 203 | C | -0.679 | -2.871  | -2.839 |
| 204 | C | 1.904  | -3.558  | -1.843 |
| 205 | C | 3.598  | -1.893  | -1.736 |
| 206 | C | 3.013  | 0.761   | -2.607 |
| 207 | C | 0.879  | 1.308   | -3.427 |
| 208 | C | -1.142 | -0.679  | -3.554 |

|     |   |        |        |        |
|-----|---|--------|--------|--------|
| 209 | C | 3.733  | 0.563  | -1.452 |
| 210 | C | 4.035  | -0.798 | -1.003 |
| 211 | C | 3.459  | 1.396  | -0.266 |
| 212 | C | 3.924  | -0.794 | 0.457  |
| 213 | C | -0.566 | -3.665 | -1.723 |
| 214 | C | 3.576  | 0.569  | 0.896  |
| 215 | C | 0.759  | -4.020 | -1.209 |
| 216 | C | 0.473  | 3.255  | -1.465 |
| 217 | C | -0.621 | 2.760  | -2.246 |
| 218 | C | -1.703 | -1.811 | -2.880 |
| 219 | C | -0.063 | 3.734  | -0.178 |
| 220 | C | -2.645 | 0.770  | -2.374 |
| 221 | C | 3.387  | -1.880 | 1.107  |
| 222 | C | 0.663  | -4.002 | 0.251  |
| 223 | C | -1.515 | 3.539  | -0.179 |
| 224 | C | -3.756 | 0.103  | -0.411 |
| 225 | C | -0.720 | -3.655 | 0.626  |
| 226 | C | 1.712  | -3.524 | 1.001  |
| 227 | C | 1.447  | -2.674 | 2.176  |
| 228 | C | -3.539 | 1.547  | -0.306 |
| 229 | C | -3.220 | 2.125  | 0.914  |
| 230 | C | -3.099 | 1.277  | 2.106  |
| 231 | C | -2.173 | 3.154  | 0.980  |
| 232 | C | 2.075  | 2.019  | 2.082  |
| 233 | C | -2.221 | -2.205 | 1.811  |
| 234 | C | 0.656  | 3.536  | 0.977  |
| 235 | C | -0.030 | 3.131  | 2.206  |
| 236 | C | -2.971 | -1.999 | 0.608  |
| 237 | C | 2.467  | -1.673 | 2.240  |
| 238 | C | -0.052 | -1.227 | 3.359  |
| 239 | C | -3.643 | -0.691 | 0.706  |
| 240 | C | -3.308 | -0.091 | 2.000  |
| 241 | C | -1.405 | 2.943  | 2.213  |
| 242 | C | -1.977 | 1.782  | 2.908  |
| 243 | C | 0.849  | 2.178  | 2.886  |
| 244 | C | 0.968  | -0.224 | 3.424  |
| 245 | C | 0.313  | 1.092  | 3.535  |
| 246 | C | -1.137 | 0.887  | 3.553  |
| 247 | C | -1.362 | -0.555 | 3.428  |
| 248 | C | -2.413 | -1.029 | 2.680  |
| 249 | C | -3.205 | -0.361 | -1.697 |
| 250 | C | -1.470 | -3.450 | -0.577 |

|     |   |        |        |        |
|-----|---|--------|--------|--------|
| 251 | C | 3.025  | -3.052 | -1.040 |
| 252 | C | 2.927  | -3.041 | 0.343  |
| 253 | C | -1.857 | 2.921  | -1.461 |
| 254 | C | -2.836 | 1.957  | -1.523 |
| 255 | C | 1.958  | 2.847  | 0.919  |
| 256 | C | 1.973  | 1.804  | -2.649 |
| 257 | C | 2.542  | 2.476  | -0.319 |
| 258 | C | 1.769  | 2.688  | -1.559 |
| 259 | C | -0.461 | 1.680  | -3.150 |
| 260 | C | -1.512 | 0.647  | -3.216 |
| 261 | C | -2.652 | -1.658 | -1.837 |
| 262 | C | -2.531 | -2.511 | -0.638 |
| 263 | C | -1.003 | -2.930 | 1.811  |
| 264 | C | 0.124  | -2.421 | 2.617  |
| 265 | C | 2.204  | -0.376 | 2.749  |
| 266 | C | 2.780  | 0.790  | 2.049  |

### 3 NMR Spectroscopy

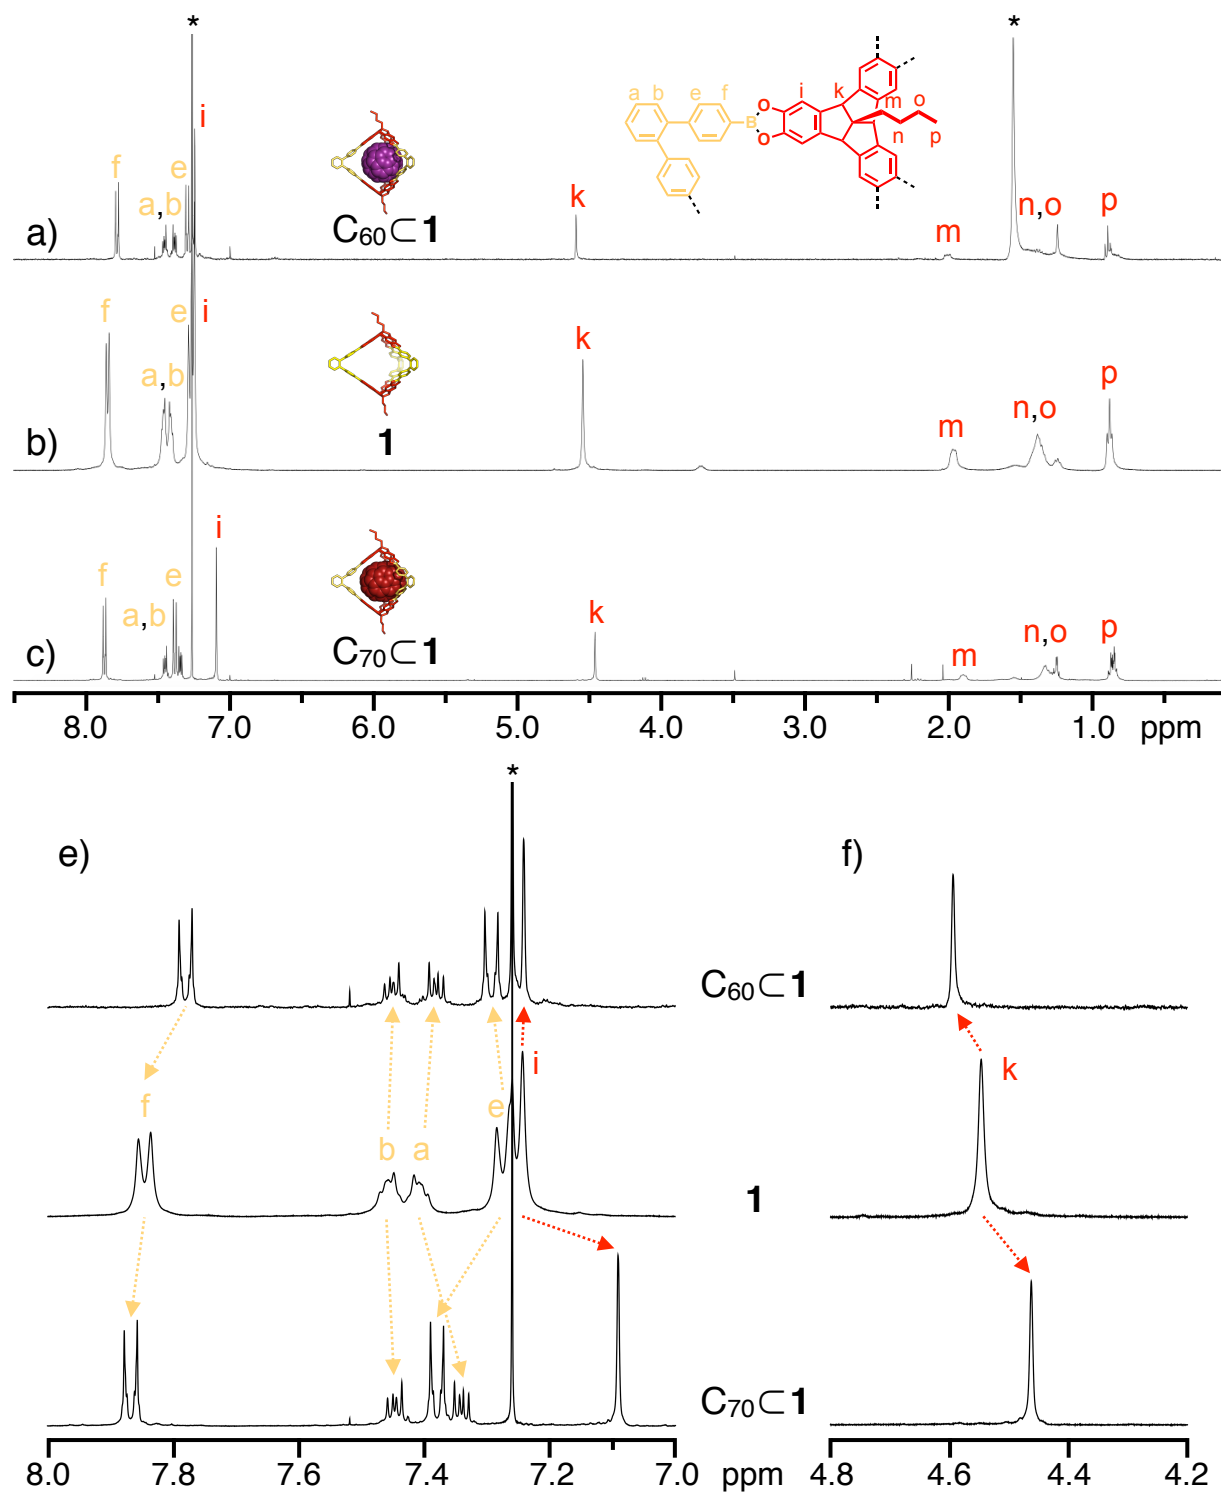

**Fig. S2.**  $^1\text{H-NMR}$  spectra (400 MHz,  $\text{CDCl}_3$ , rt) of a)  $\text{C}_{60}\text{C}1$ , b) **1** and c)  $\text{C}_{60}\text{C}1$ ; zoom-in for e) aromatic (7–8 ppm) and f) TBTQ bridgehead region (4.2–4.8 ppm) indicate changes in chemical shift upon complexation. \* Indicates residual solvent  $\text{CHCl}_3$  and  $\text{H}_2\text{O}$ .

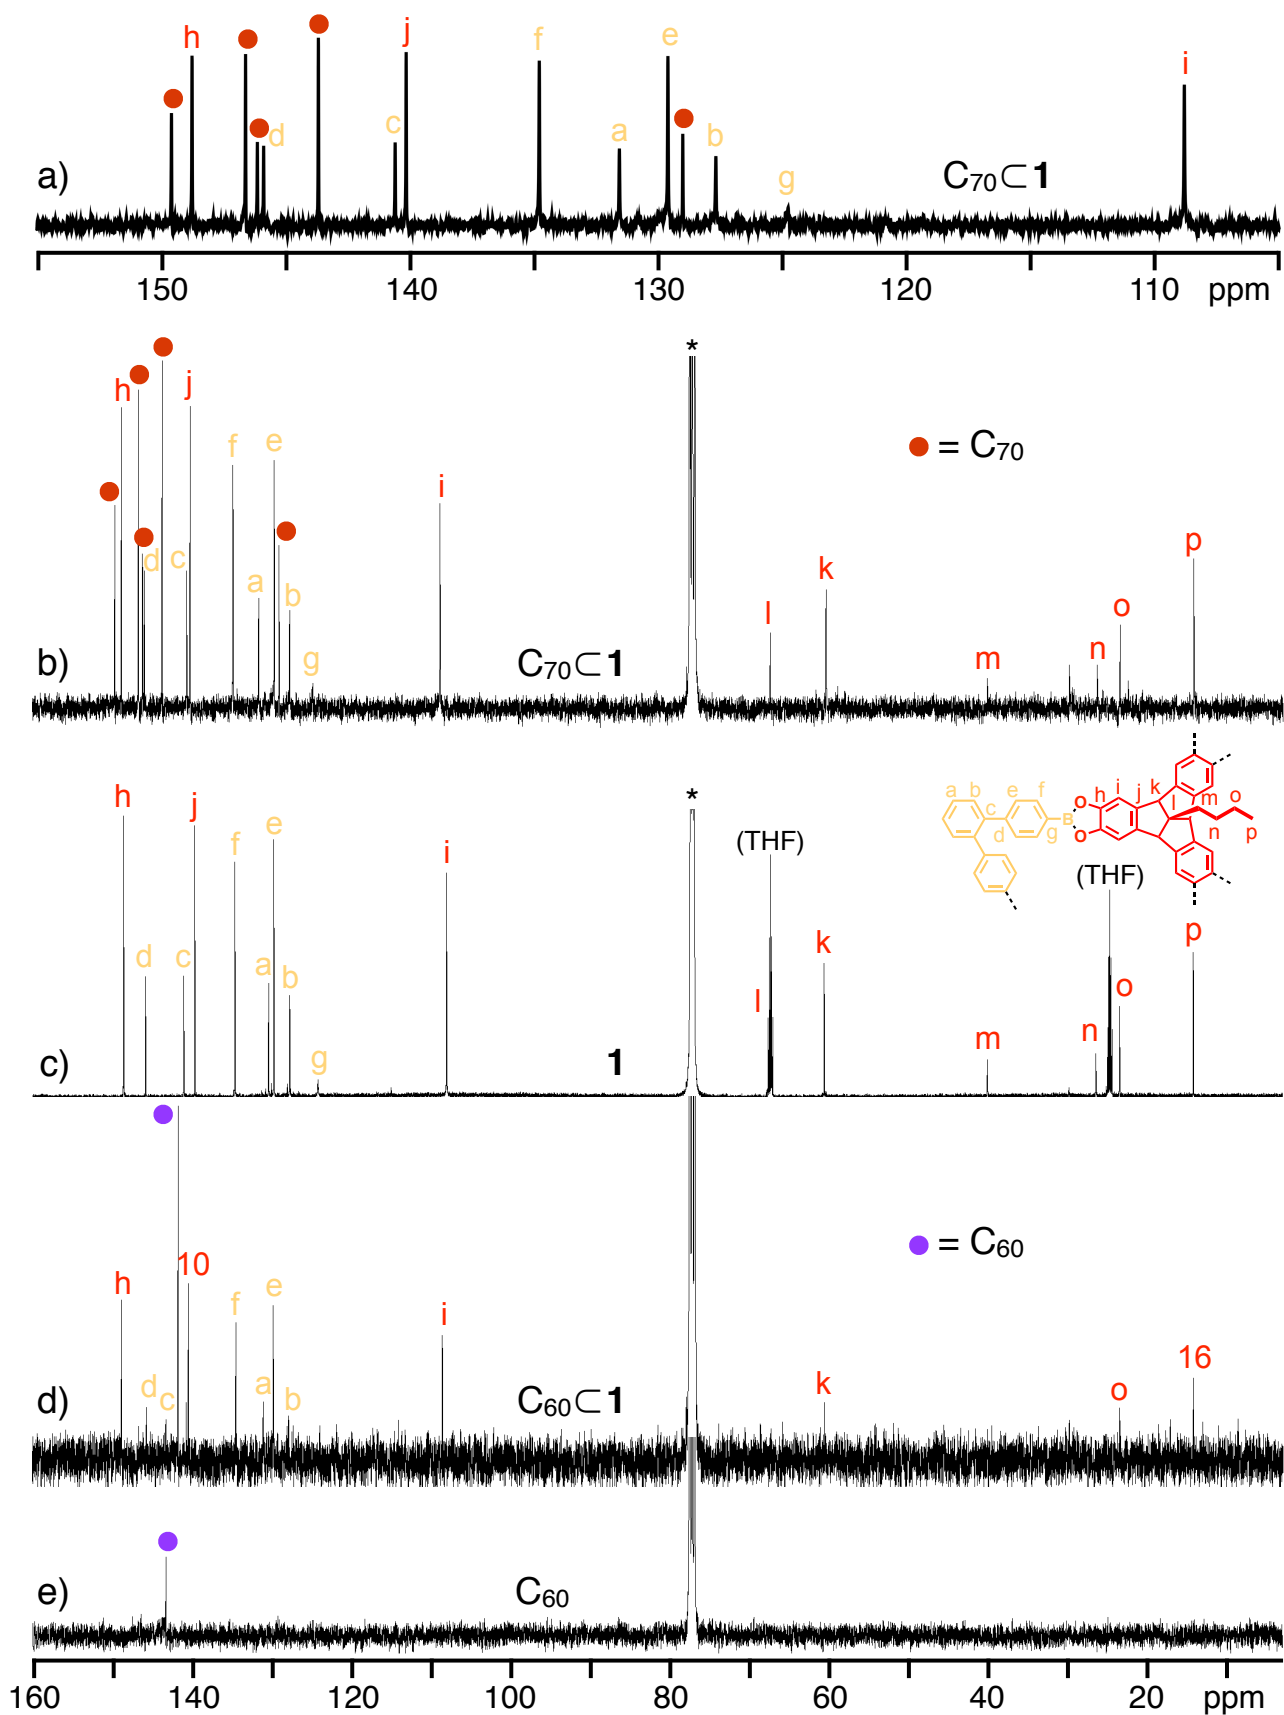

**Fig. S3.**  $^{13}C$ -NMR spectra (100 MHz,  $CDCl_3$ , rt) for a) aromatic region (100–160 ppm) of  $C_{70}C_1$ , b)  $C_{70}C_1$ , c) **1** (150 MHz), d)  $C_{60}C_1$  and e)  $C_{60}$ . \* Indicates  $CDCl_3$  signals.

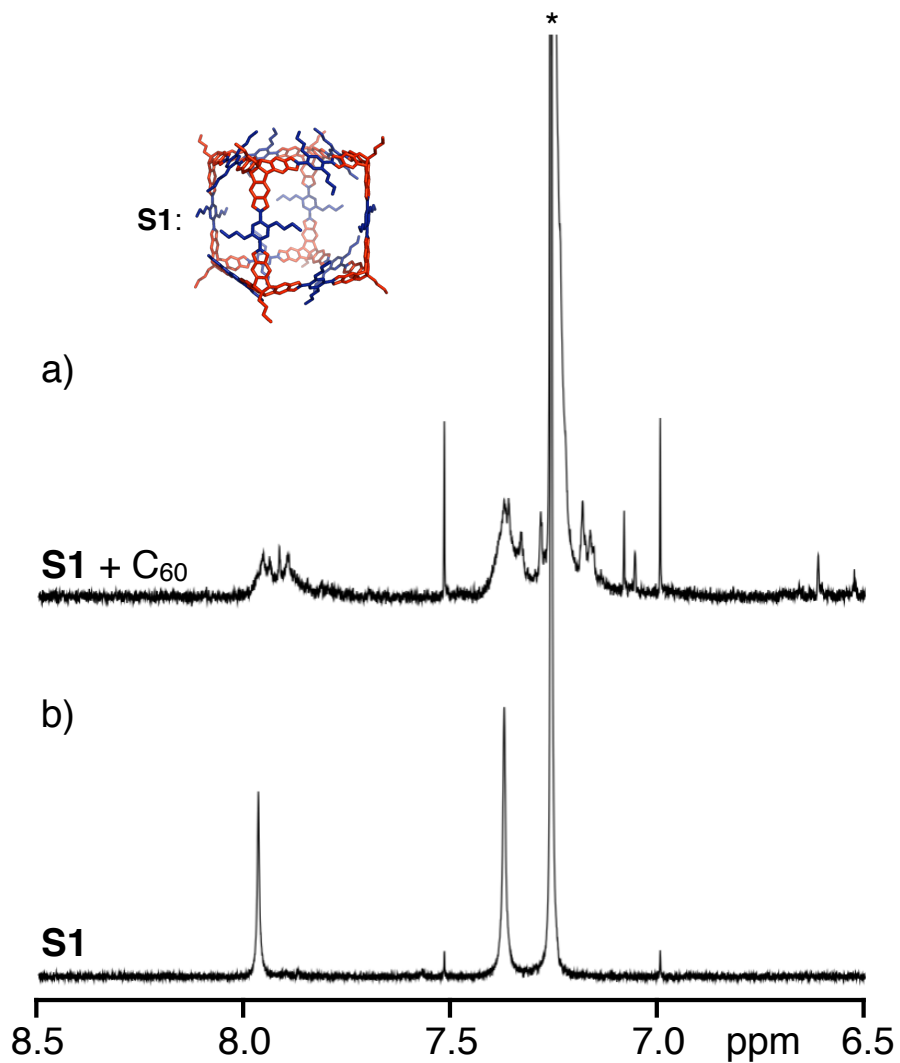

**Fig. S4.** <sup>1</sup>H-NMR spectra (400 MHz, CDCl<sub>3</sub>, rt) for a mixture of cubic cage **S1** and C<sub>60</sub> indicating no complex formation.



## 4 UV/Vis Absorption Spectroscopy

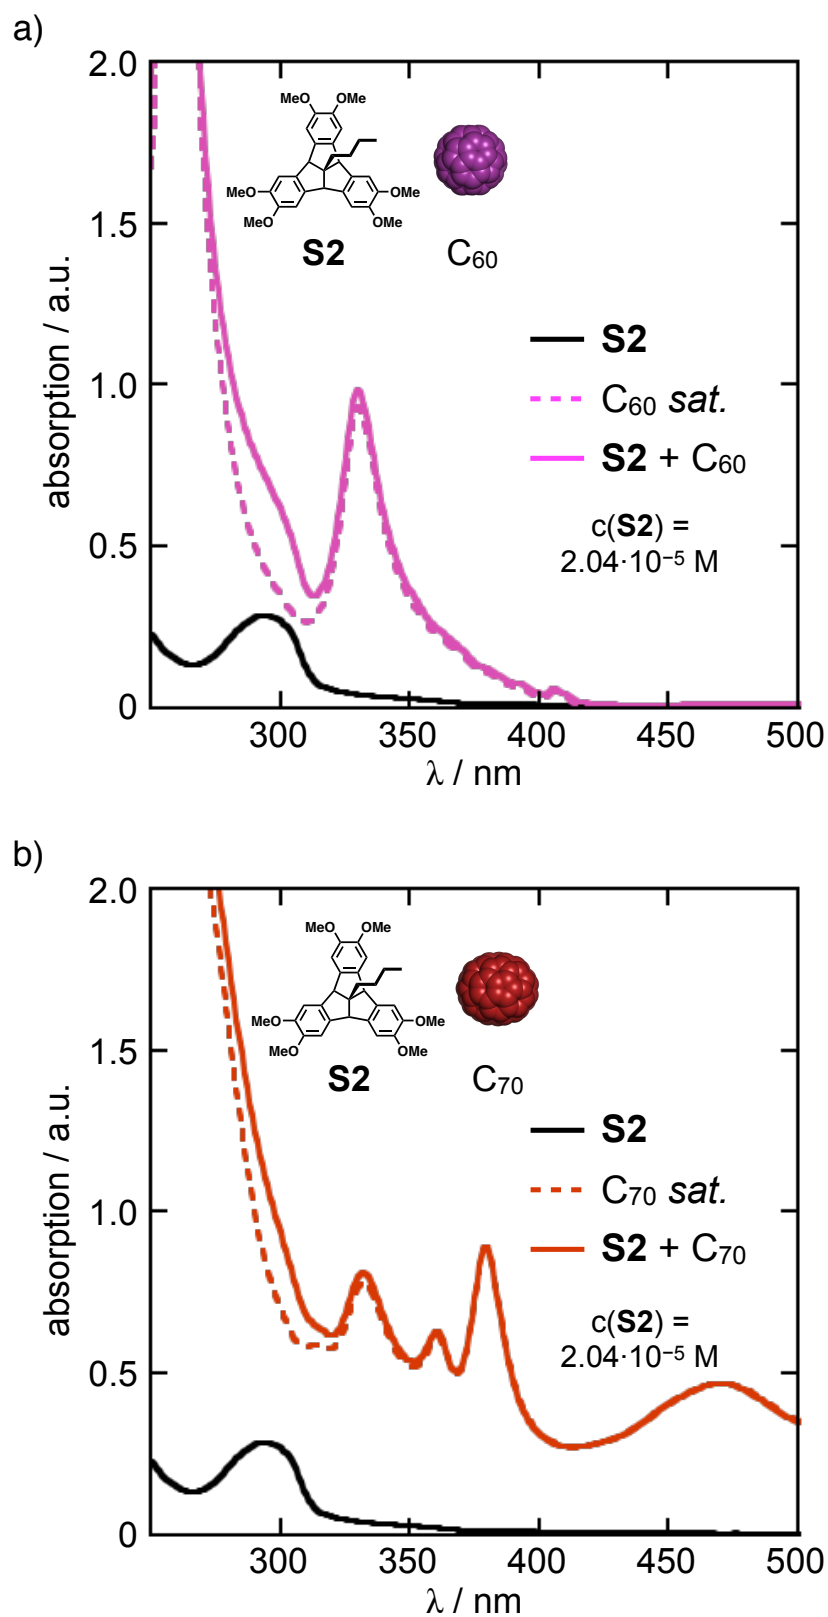

**Fig. S5.** UV/Vis absorption spectra ( $\text{CHCl}_3$ , rt) for hexamethoxy TBTQ **S2** (black,  $c(\mathbf{S2}) = 2.04 \cdot 10^{-5} \text{ M}$ ) in saturated solutions of a)  $\text{C}_{60}$  (magenta, dotted line without **S2**) and b)  $\text{C}_{70}$  (brown, dotted line without **S2**).

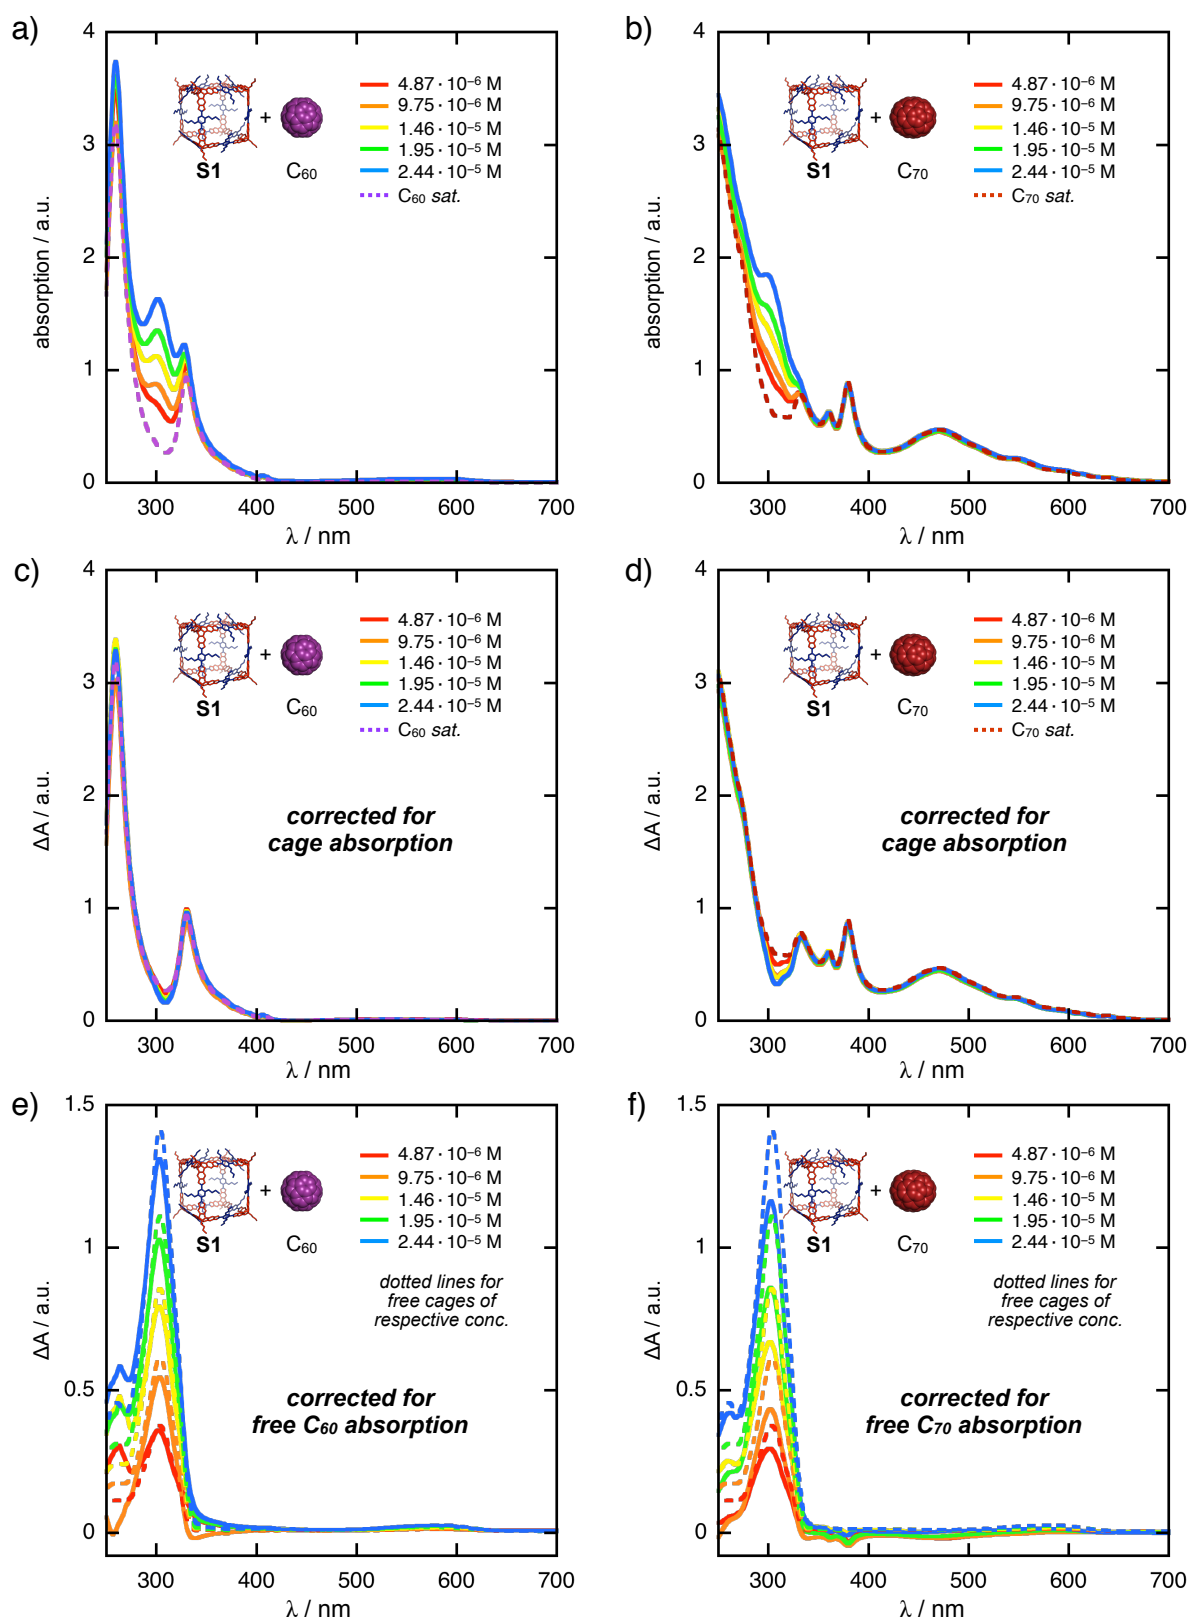

**Fig. S6.** UV/Vis absorption spectra (CDCl<sub>3</sub>, rt) for mixtures of cubic cage S1 with fullerenes: a) S1 + C<sub>60</sub>, b) S1 + C<sub>70</sub>, c) S1 + C<sub>60</sub> (cage absorption subtracted), d) S1 + C<sub>70</sub> (cage absorption subtracted), e) S1 + C<sub>60</sub> (saturated C<sub>60</sub> absorption subtracted) and f) S1 + C<sub>70</sub> (saturated C<sub>70</sub> absorption subtracted).

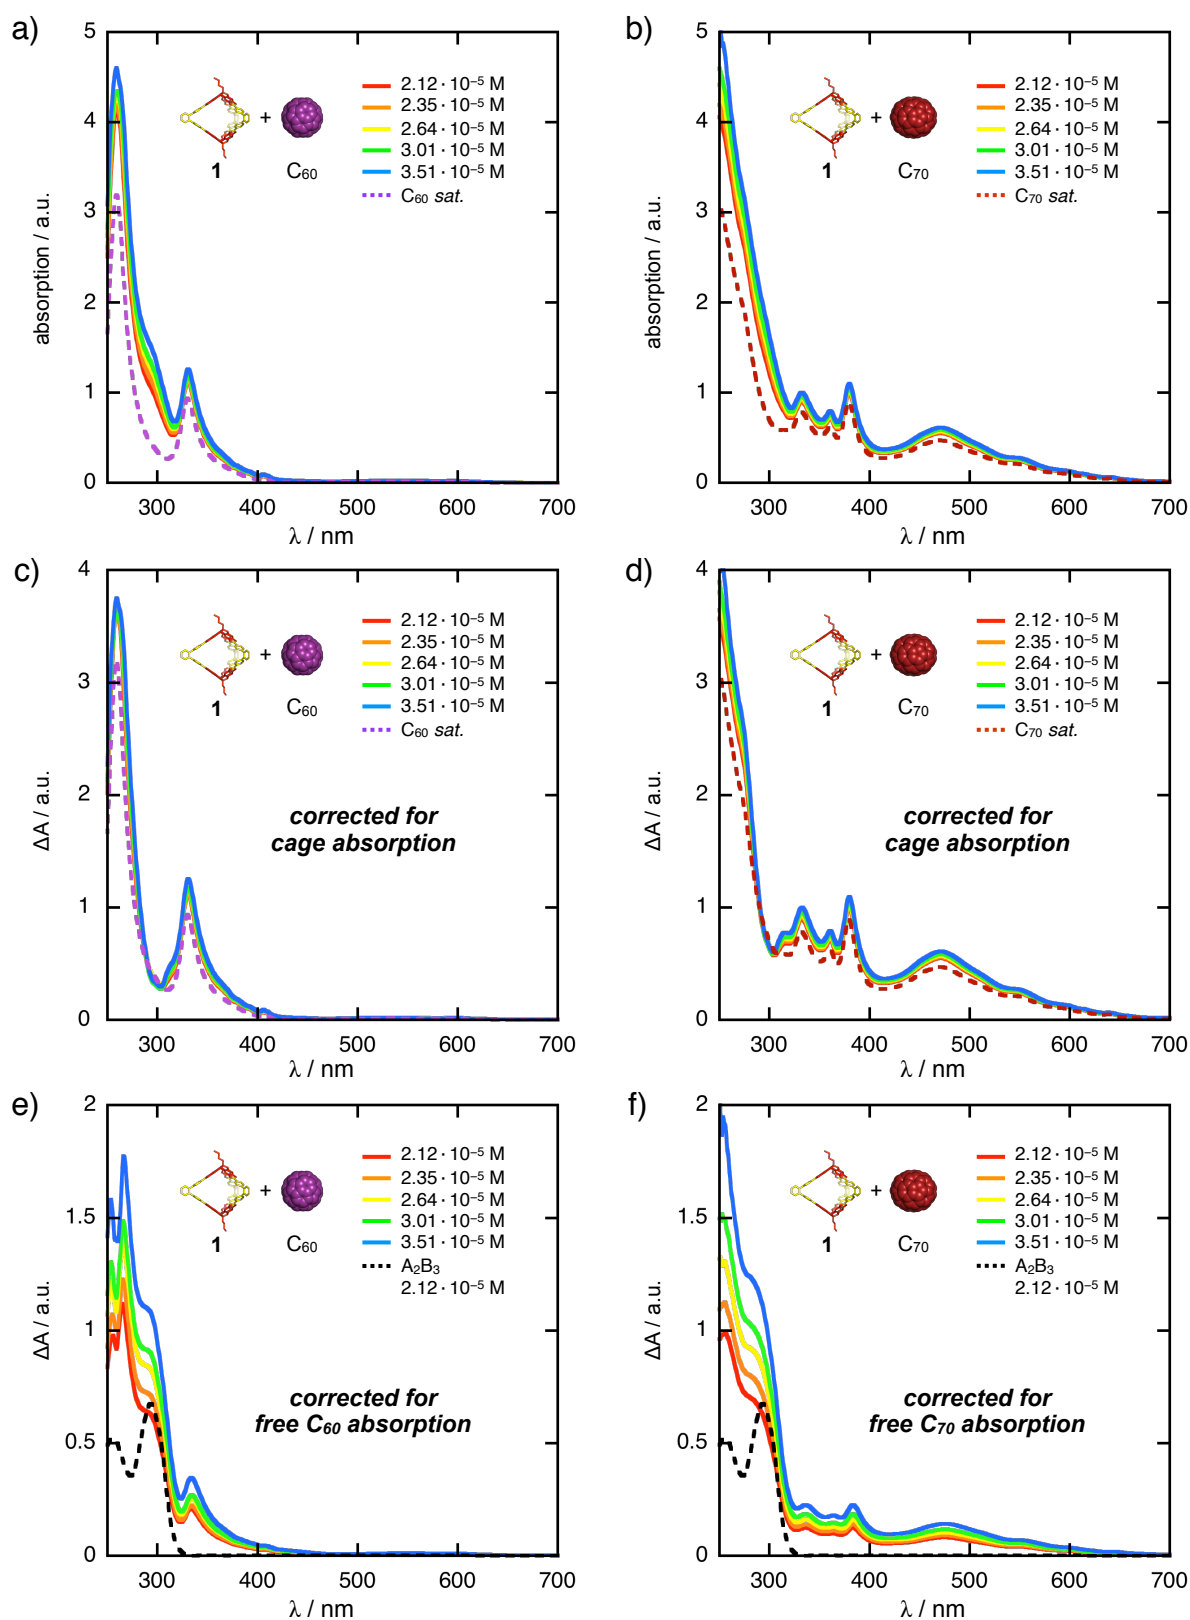

**Fig. S7.** UV/Vis absorption spectra (CDCl<sub>3</sub>, rt) for mixtures of **1** with fullerenes: a) **1** + C<sub>60</sub>, b) **1** + C<sub>70</sub>, c) **1** + C<sub>60</sub> (cage absorption subtracted), d) **1** + C<sub>70</sub> (cage absorption subtracted), e) **1** + C<sub>60</sub> (saturated C<sub>60</sub> absorption subtracted) and f) **1** + C<sub>70</sub> (saturated C<sub>70</sub> absorption subtracted).

## Determination of binding constants by quantitative UV/Vis titration experiments:

Quantitative UV/Vis absorption measurements were performed in CHCl<sub>3</sub> (HPLC grade from FISHER SCIENTIFIC) in 10 cm cuvettes. Fullerene solutions of constant concentration ( $c(C_{60}) = c(C_{70}) = 1.00 \cdot 10^{-6} \text{ mol} \cdot \text{L}^{-1}$ ) were titrated with varying amounts of a stock solution of cage **1** ( $c(\mathbf{1}) = 6.00 \cdot 10^{-6} \text{ mol} \cdot \text{L}^{-1}$ ) ranging from  $1.15 \cdot 10^{-7} \text{ mol} \cdot \text{L}^{-1}$  to  $3.00 \cdot 10^{-6} \text{ mol} \cdot \text{L}^{-1}$  (see Figures S8 and S9 for UV/Vis absorption spectra for titration experiments with C<sub>60</sub> and C<sub>70</sub>, respectively). All samples were measured after equilibration for 24 hours at room temperature. Data sets were fitted to equation 1 according to a 1:1 binding model with the software package OriginPro 2015.<sup>S5</sup>

$$\Delta A = \left( \frac{d \cdot \Delta \varepsilon}{2} \right) \left( [C_{60}]^0 + [1]^0 + \frac{1}{K_a} - \sqrt{\left( [C_{60}]^0 + [1]^0 + \frac{1}{K_a} \right)^2 - 4[C_{60}]^0[1]^0} \right) \quad \text{equation 1}$$

$$\Delta A = A_{\text{obs}} - (A_{C_{60}} + A_1) \quad \text{equation 2}$$

$$\Delta \varepsilon = \varepsilon_{C_{60} \subset 1} - (\varepsilon_{C_{60}} + \varepsilon_1) \quad \text{equation 3}$$

$d$  = length of cuvette

$[C_{60}]^0$  = total concentration of C<sub>60</sub>

$[1]^0$  = total concentration of cage **1**

$\Delta A$  was calculated from titration spectra ( $A_{\text{obs}}$ ) and reference measurements for C<sub>60</sub> and **1** ( $A_{C_{60}}$  and  $A_1$ ) according to equation 2.

$K_a$  and  $\Delta \varepsilon$  were obtained via global fit to equation 1 for  $\lambda = 309\text{--}408$  (C<sub>60</sub>) and  $335\text{--}424$  (C<sub>70</sub>) nm. Remaining  $\Delta \varepsilon$  ( $\lambda = 250\text{--}308$  and  $409\text{--}700$  nm for C<sub>60</sub>;  $\lambda = 250\text{--}308$  and  $409\text{--}700$  nm for C<sub>70</sub>) were obtained after fitting to equation 1 with constant  $K_a$  obtained from the global fit.

$\varepsilon_{C_{60} \subset 1}$  were calculated according to equation 3 and plotted in Figure 2c,d.

$$K_a(C_{60} \subset 1) = 6.3 \pm 0.4 \times 10^5 \text{ M}^{-1}$$

$$K_a(C_{70} \subset 1) = 5.3 \pm 0.4 \times 10^5 \text{ M}^{-1}$$

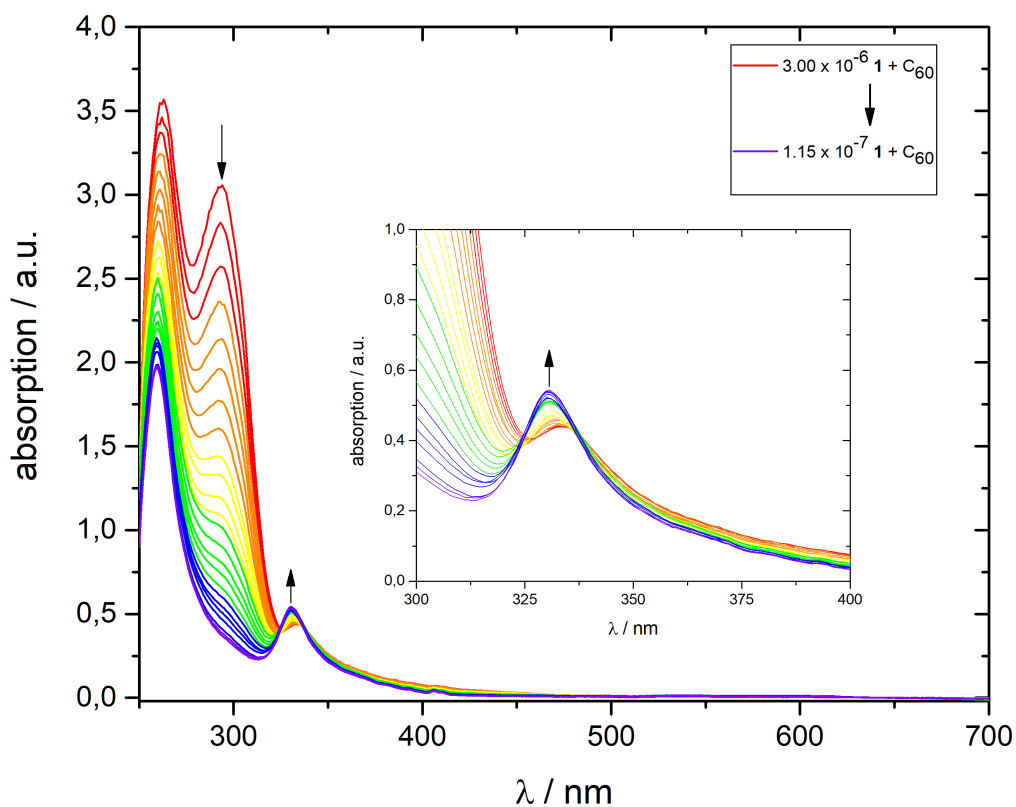

**Fig. S8.** UV/Vis absorption spectra (CHCl<sub>3</sub>, 298 K) for titration of C<sub>60</sub> (1.00 · 10<sup>-6</sup> mol · L<sup>-1</sup>) with cage 1 (1.15 · 10<sup>-7</sup>–3.00 · 10<sup>-6</sup> mol · L<sup>-1</sup>).

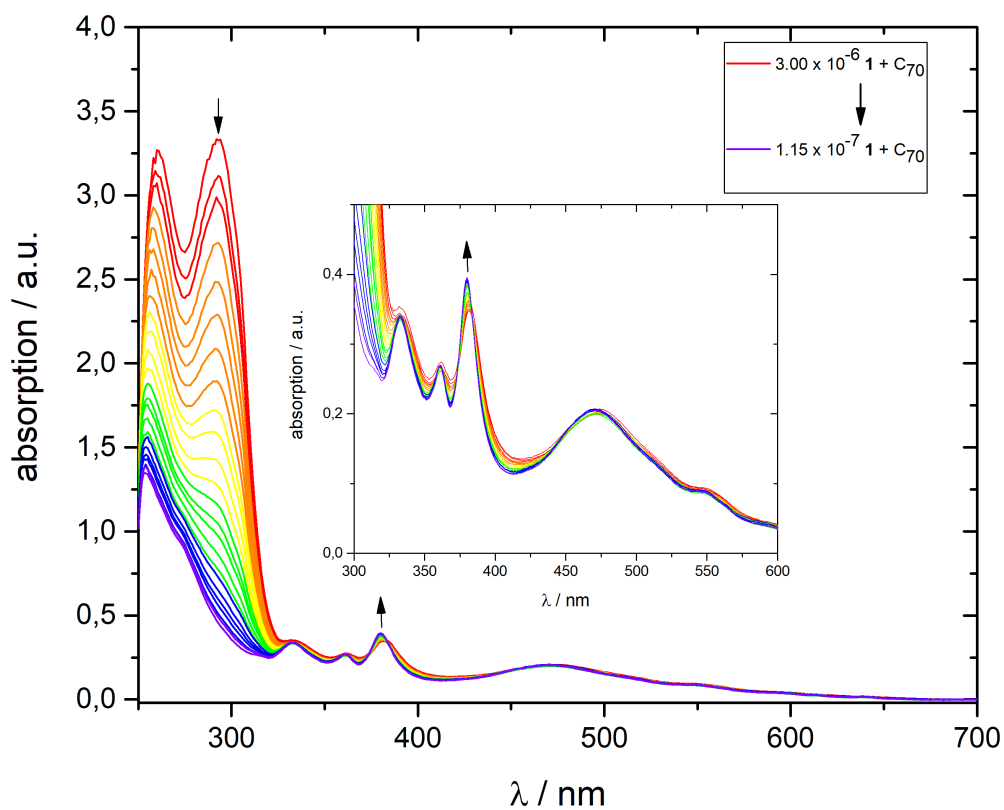

**Fig. S9.** UV/Vis absorption spectra (CHCl<sub>3</sub>, 298 K) for titration of C<sub>70</sub> (1.00 · 10<sup>-6</sup> mol · L<sup>-1</sup>) with cage 1 (1.15 · 10<sup>-7</sup>–3.00 · 10<sup>-6</sup> mol · L<sup>-1</sup>).

## 5 Mass Spectrometry

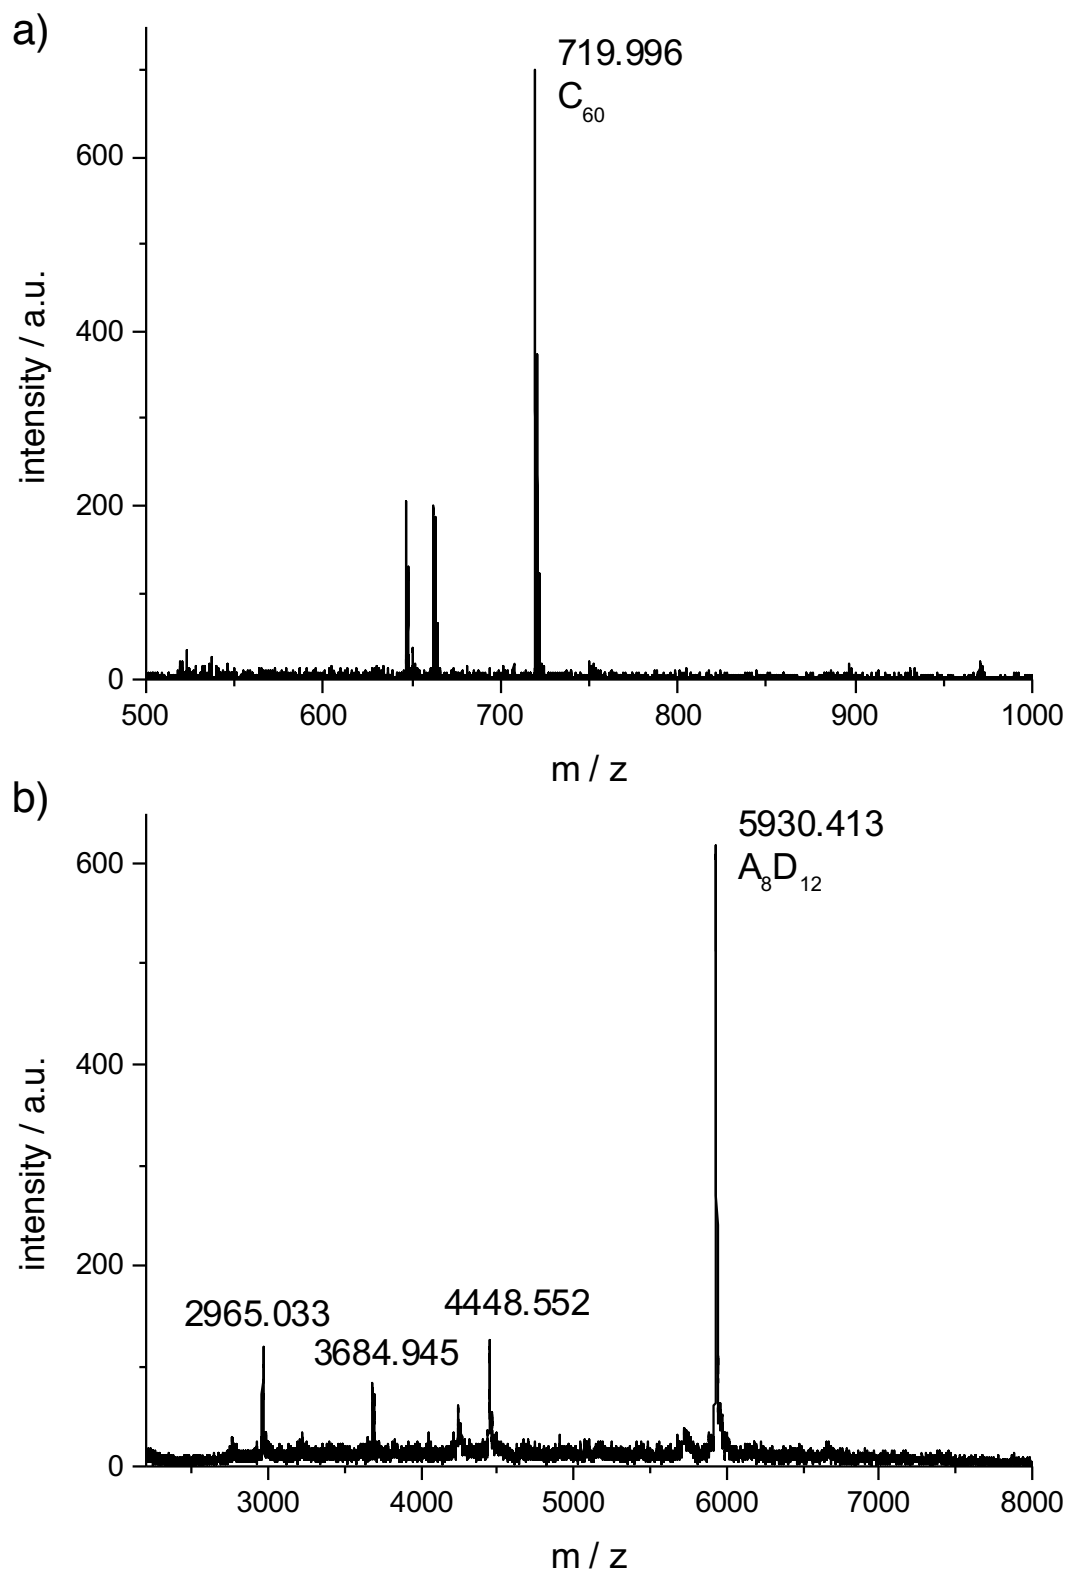

**Fig. S10.** MALDI-TOF mass spectrum ( $CHCl_3$ , matrix DCTB) from a  $CHCl_3$  solution of mixtures of cubic cage **S1** and  $C_{60}$  indicating no complex formation.

## 6 Crystallographic Data

Single crystals suitable for X-ray diffraction were obtained after initial attempts to perform Bingel-type reactions on C<sub>60</sub>⊂**1**: C<sub>60</sub> (4.00 mg, 5.55 μmol, 1 eq) was added to a solution of **1** (10.3 mg, 6.43 μmol, 1.1 eq) in dry CHCl<sub>3</sub> (8 mL). After stirring over night at room temperature, the solution was sonicated for one hour at room temperature and the insoluble residues were removed by filtration through a syringe filter. Na<sub>2</sub>CO<sub>3</sub> (15.5 mg), dry DMSO (1 mL) and diethyl bromomalonate (9 μL) were added and the mixture was stirred at 0 °C for two hours. After aqueous work up, the organic layer was dried over Na<sub>2</sub>SO<sub>4</sub> and single crystals were grown after slow evaporation of the solvent overnight.

Single crystals were mounted on a 100 μm MiTeGen MicroLoop using perfluorinated polyalkylether. Single crystal X-ray diffraction data were collected at 100 K on a Bruker D8 Quest Kappa diffractometer with a Photon100 CMOS detector and multi-layered mirror monochromated Cu<sub>Kα</sub> radiation. The images were processed with the Bruker software packages and equivalent reflections were merged. The data were corrected for absorption effects using the multi-scan method. Corrections for Lorentz and polarization effects were applied. The structures were solved by direct methods, refined with the SHELXTL software package,<sup>S6</sup> and expanded using Fourier techniques. All non-hydrogen atoms were refined anisotropically. Hydrogen atoms were assigned to geometrically idealized positions and were included in structure factor calculations.

### Crystal data and refinement details for C<sub>60</sub>⊂**1**:

Supplementary crystallographic data for C<sub>60</sub>⊂**1** can be obtained free of charge from *The Cambridge Crystallographic Data Centre* via [www.ccdc.cam.ac.uk/data\\_request/cif](http://www.ccdc.cam.ac.uk/data_request/cif), CCDC 1913637.

C<sub>60</sub>⊂**1** cocrystallized with one molecule of diethyl bromomalonate, which remained from the synthesis attempts under Bingel conditions.

All atoms for cage **1** could be anisotropically refined with reasonable atomic displacement parameters. Due to very low internal rotational barriers, refinement for the encapsulated C<sub>60</sub> appeared to be much more difficult. We therefore used an idealized molecular geometry for C<sub>60</sub> (based on DFT calculations) for an AFIX restraint and refined this molecule with 50% occupancy (C<sub>2</sub> axis through the center of the cage pores). ISOR restraints were applied to all C<sub>60</sub> atoms. We note that this simple refinement model still does not fully describe the C<sub>60</sub> rotation but we refrained from introducing further disorder for the guest as refinement was not further improved.

Twofold disorder was obtained for both COOCH<sub>2</sub>CH<sub>3</sub> substituents of the diethyl bromomalonate molecule (59.1/40.9 and 68.6/31.4 % occupancy, respectively) and DELU and SIMU restraints were applied to atoms of both side arms.

In order to remove the electron density from highly disordered solvent molecules that could not be modeled satisfactorily, the data set was treated with the PLATON SQUEEZE<sup>S7</sup> function. Hence, two pores (2544 Å<sup>3</sup>, 880 electrons) per unit cell were obtained occupying 31% of the unit cell volume.

**Table S4.** Crystal data and structure refinement for  $C_{60} \subset 1$ 

|                                          |                                                                                                                                        |
|------------------------------------------|----------------------------------------------------------------------------------------------------------------------------------------|
| Empirical formula                        | $C_{60} \subset C_{106}H_{72}B_6O_4 \cdot (C_7H_{11}BrO_4)_2$                                                                          |
| Formula weight                           | 2801.23 g mol <sup>-1</sup>                                                                                                            |
| Temperature                              | 100(2) K                                                                                                                               |
| Wavelength                               | 1.54178 Å                                                                                                                              |
| Crystal System, space group              | Monoclinic, $C2/c$ (No. 15)                                                                                                            |
| Unit cell dimensions                     | $a = 23.3258(10)$ Å, $\alpha = 90^\circ$<br>$b = 22.5169(10)$ Å, $\beta = 91.177(2)^\circ$<br>$c = 31.3889(12)$ Å, $\gamma = 90^\circ$ |
| Volume                                   | 16482.7(12) Å <sup>3</sup>                                                                                                             |
| Z, calculated density                    | 4, 1.129 g cm <sup>-3</sup>                                                                                                            |
| Absorption coefficient                   | 1.121 mm <sup>-1</sup>                                                                                                                 |
| F(000)                                   | 5736                                                                                                                                   |
| Crystal size                             | 0.500 · 0.110 · 0.090 mm <sup>3</sup>                                                                                                  |
| $\theta$ range for data collection       | 2.728–72.361°                                                                                                                          |
| Index ranges                             | $-28 \leq h \leq 28$ , $-27 \leq k \leq 27$ , $-38 \leq l \leq 35$                                                                     |
| Reflections collected / unique           | 168505 / 16220 [ $R_{\text{int}} = 0.0337$ ]                                                                                           |
| Completeness to $\theta = 67.679^\circ$  | 99.9 %                                                                                                                                 |
| Absorption correction                    | multi-scan                                                                                                                             |
| Max. and min. transmission               | 0.7536 and 0.4906                                                                                                                      |
| Refinement method                        | Full-matrix least-squares on $F^2$                                                                                                     |
| Data / restraints / parameters           | 16220 / 490 / 1100                                                                                                                     |
| Goodness-of-fit on $F^2$                 | 2.266                                                                                                                                  |
| Final $R$ indices [ $I > 2(\sigma(I))$ ] | $R_1 = 0.1218$ , $wR_2 = 0.4333$                                                                                                       |
| $R$ indices (all data)                   | $R_1 = 0.1264$ , $wR_2 = 0.4437$                                                                                                       |
| Largest diff. peak and hole              | 1.799 and $-2.476$ e Å <sup>-3</sup>                                                                                                   |



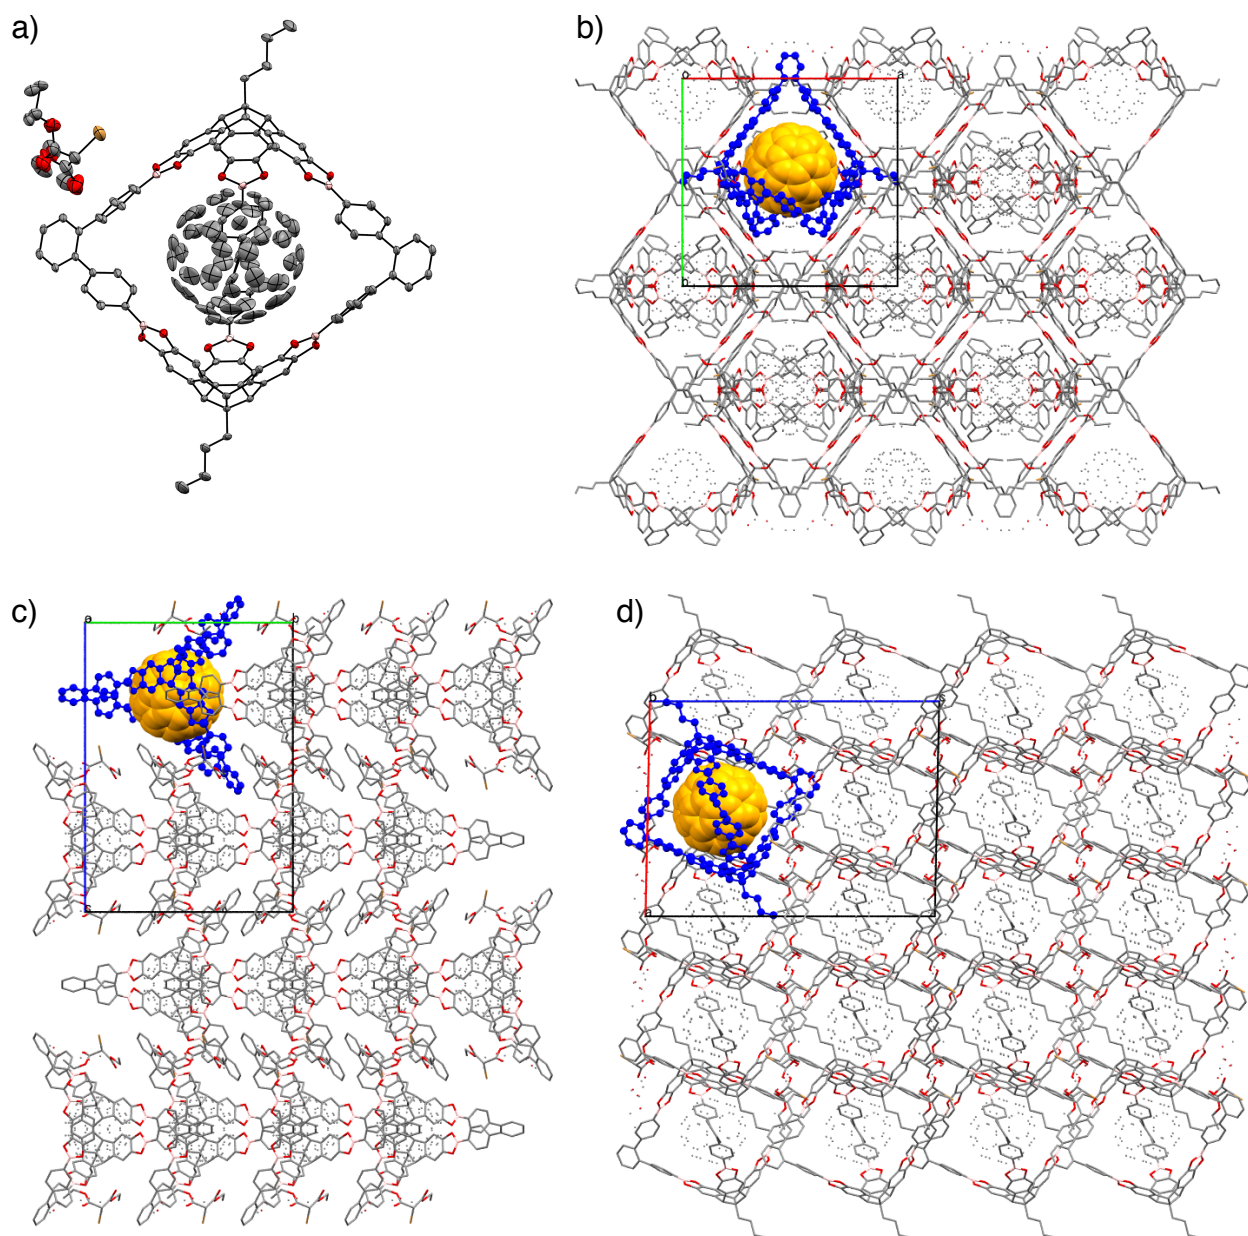

**Fig. S11.** SC-XRD of C<sub>60</sub>C1: a) ORTEP representation of single complex C<sub>60</sub>C1 (thermal ellipsoids set to 50% probability, C grey, O red, B light red, Br yellow, hydrogen atoms omitted for clarity); crystal packing with views along the crystallographic (b) c, (c) a and (d) b axis (single cage **1** and C<sub>60</sub> are highlighted in blue and orange, respectively).

## 7 Synthesis of *N*-Methylfulleropyrrolidines

Synthesis of *N*-methylfulleropyrrolidines  $C_{60}(CH_2NCH_3CH_2)_n$  (**2** (mono,  $n=1$ ), **3** (bis,  $n=2$ ), **4** (tris,  $n=3$ ), **5** (tetrakis,  $n=4$ ), **6** (pentakis,  $n=5$ ), **7** (hexakis,  $n=6$ ) was performed according to a previously reported procedure.<sup>S8</sup>

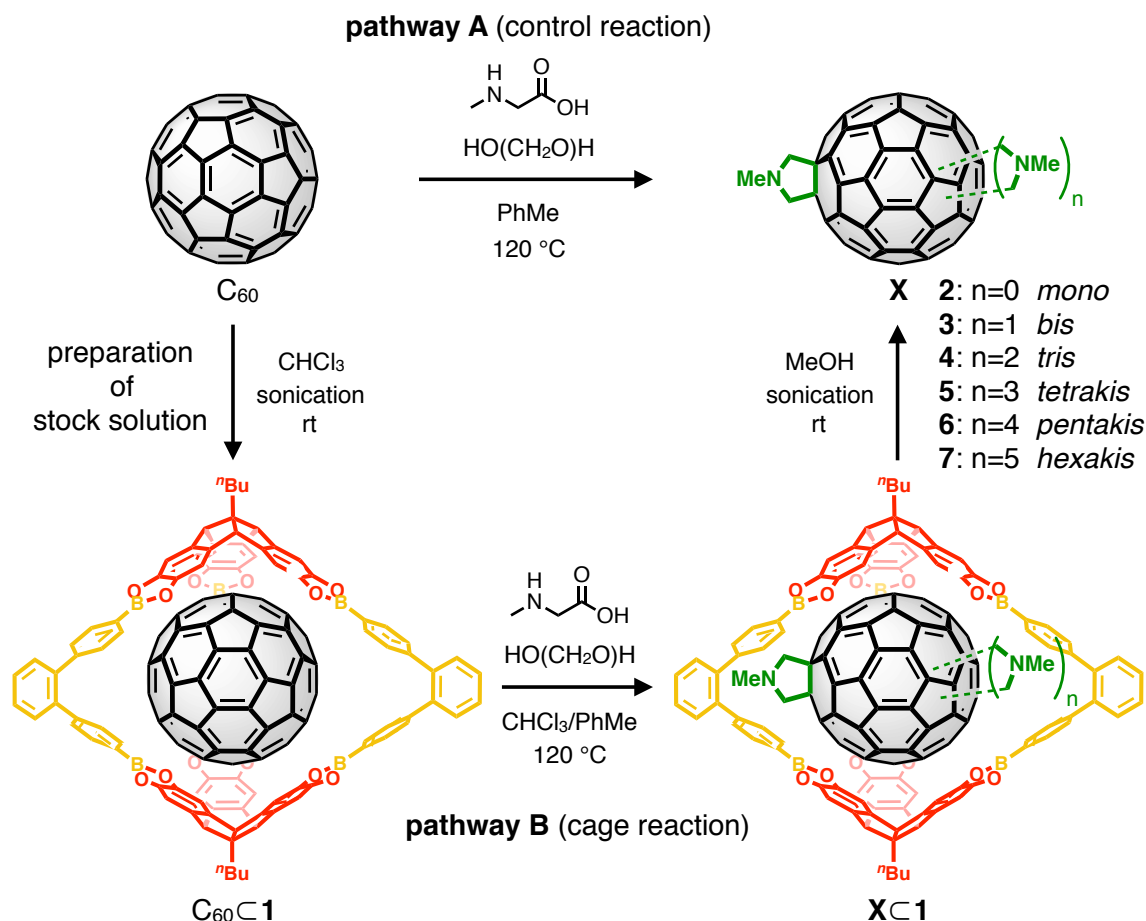

**Scheme 1.** Synthesis of *N*-methylfulleropyrrolidines from  $C_{60}$  as control reaction (pathway **A**) and in cage-templated reactions from  $C_{60}C1$  (pathway **B**).

### Preparation of stock solution for $C_{60}C1$ :

$C_{60}$  (4.00 mg, 5.55  $\mu\text{mol}$ , 1 eq.) was added to a solution of **1** (10.7 mg, 6.68  $\mu\text{mol}$ , 1.2 eq.) in dry  $\text{CHCl}_3$  (8 mL). The suspension was stirred overnight at room temperature. Subsequently, the solution was sonicated for four hours at room temperature. After filtration of insoluble residues, another 0.2 equivalents of **1** were added and the solution was diluted with dry toluene (8 mL).

### General procedure for the synthesis of *N*-methylfulleropyrrolidines:<sup>S8</sup>

$C_{60}$  was dissolved in toluene (pathway **A**) or used as stock solution of  $C_{60}C1$  (pathway **B**). *N*-methylglycine and paraformaldehyde were added and the reaction mixture was heated to reflux. Progress of the reaction was followed by MALDI-TOF MS. For pathway **B**, reactions were quenched with MeOH. Regioisomeric mixtures of bis- and trisadducts were analyzed via analytical HPLC by comparison of the order of elution and UV/Vis absorption spectra to published data for *N*-methylfulleropyrrolidine bis- and trisadducts.<sup>S9,S10</sup> Relative yields were estimated by integration of the elution peaks detected via UV/Vis absorption at  $\lambda = 310$  nm with the OriginPro 2015<sup>S5</sup> software.

**Table S5.** Different batches for the synthesis of *N*-methylfulleropyrrolidines.

|    | $C_{60}$                           |               |     | <i>N</i> -methylglycine |               |     | PFA <sup>1</sup> | toluene | time  |
|----|------------------------------------|---------------|-----|-------------------------|---------------|-----|------------------|---------|-------|
|    | M / mg                             | N / $\mu$ mol | eq. | M / mg                  | N / $\mu$ mol | eq. | M / mg           | V / ml  | T / h |
| A0 | 1000                               | 1380          | 1   | 250                     | 2780          | 2   | 310              | 700     | 8     |
| A1 | 4.05                               | 5.55          | 1   | 1.66                    | 18.6          | 3.3 | 2.03             | 8       | 42    |
| A2 | 4.49                               | 6.23          | 1   | 2.99                    | 33.6          | 5.4 | 3.34             | 8       | 20    |
| B1 | $C_{60}$ ⊂1 (16 mL stock solution) |               |     | 1.66                    | 18.3          | 3.3 | 2.03             | —       | 42    |
| B2 | $C_{60}$ ⊂1 (16 mL stock solution) |               |     | 2.57                    | 28.8          | 5.2 | 3.27             | —       | 20    |
| B3 | $C_{60}$ ⊂1 (16 mL stock solution) |               |     | 4.38                    | 49.2          | 8.9 | 5.45             | —       | 20    |

<sup>1</sup>PFA = paraformaldehyde**Table S6.** Relative yields<sup>1</sup> for *N*-methylfulleropyrrolidines.

|    | $C_{60}$ | monoadduct 2 | bisadducts 3 | trisadducts 4 |
|----|----------|--------------|--------------|---------------|
| A0 | 4.71 %   | 28.0 %       | 65.5 %       | 1.78 %        |
| B1 | 42.2 %   | 34.3 %       | 22.1 %       | 1.48 %        |
| B2 | 38.6 %   | 34.1 %       | 24.4 %       | 2.92 %        |
| B3 | 6.60 %   | 12.0%        | 17.4 %       | 63.8 %        |

<sup>1</sup>Estimated based on integration of HPLC elution peaks detected by UV/Vis absorption at  $\lambda = 310$  nm.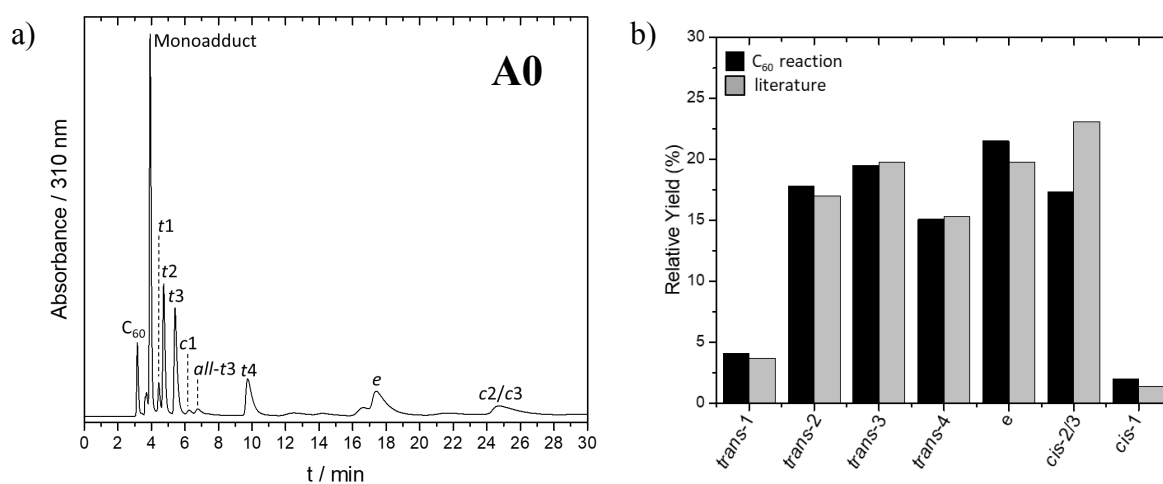**Fig. S12.** a) HPLC chromatogram for control reaction A0 ( $C_{60}$ , 2 eq. *N*-methylglycine, 8h) and relative yield for regioisomeric bisadducts 3 (literature values<sup>S10</sup> in grey for comparison).

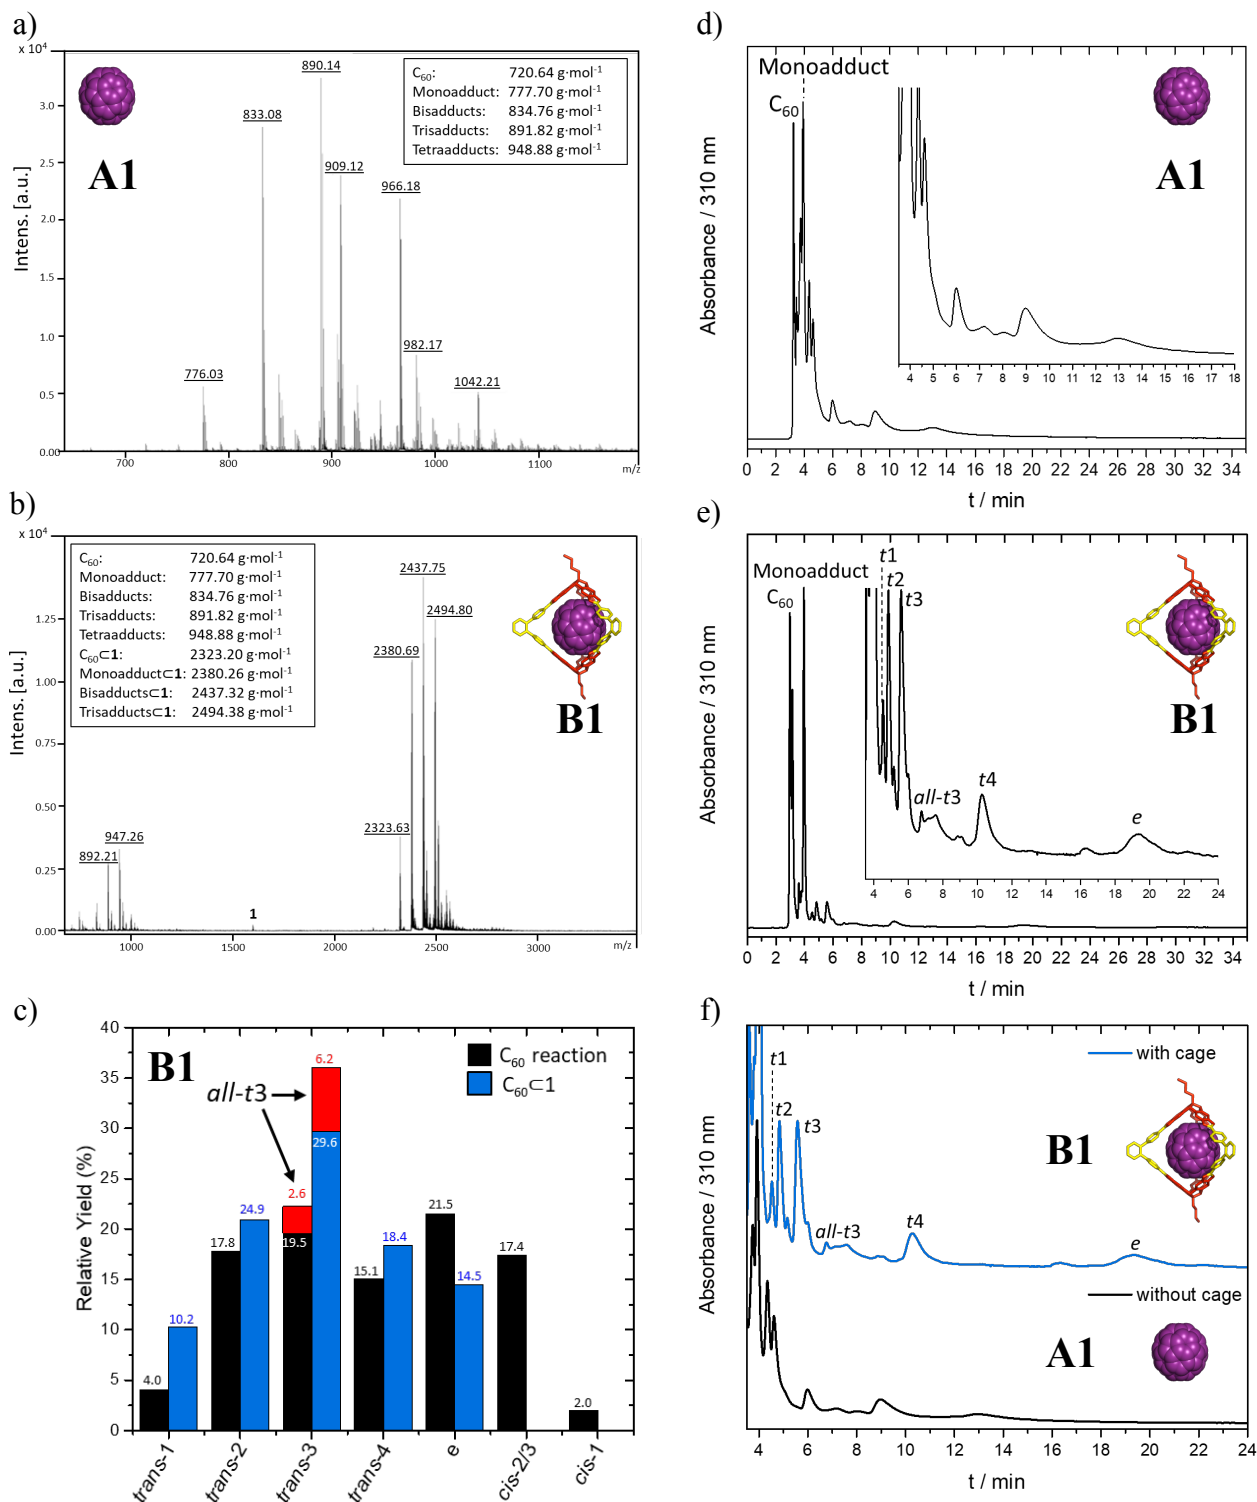

**Fig. S13.** MALDI-TOF MS (DCTB, CHCl<sub>3</sub>) for a) control reaction **A1** ( $C_{60}$ , 3 eq. *N*-methylglycine, 42h) and b) cage reaction **B1** ( $C_{60}\subset 1$ , 3 eq. *N*-methylglycine, 42h); c) relative yields for regioisomeric bisadducts **3** and trisadduct **4-t3, t3, t3** (red) for **A0** (black) and **B1** (blue); HPLC chromatograms (UV/Vis detection at  $\lambda = 310$  nm) for d) **A1**, e) **B1** and f) comparison of bisadduct region for **A1** and **B1**.

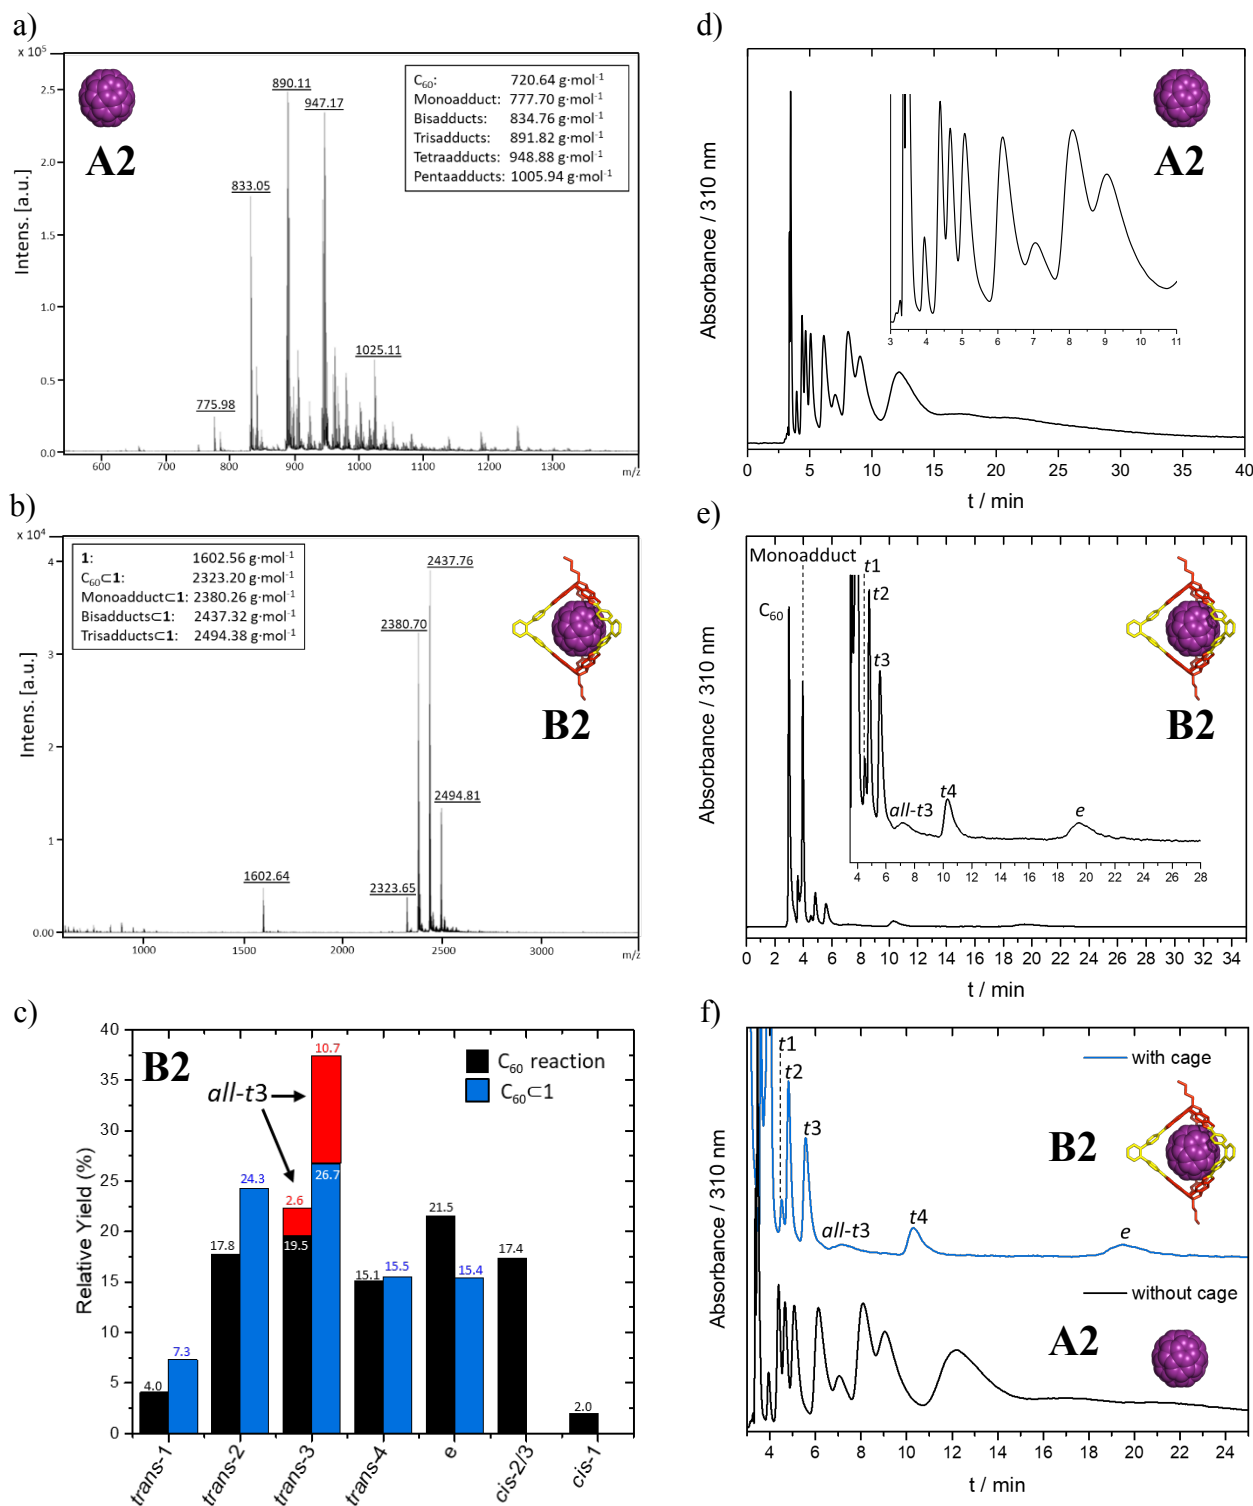

**Fig. S14.** MALDI-TOF MS (DCTB,  $CHCl_3$ ) for a) control reaction **A2** ( $C_{60}$ , 5 eq. *N*-methylglycine, 20h) and b) cage reaction **B2** ( $C_{60}\subset 1$ , 5 eq. *N*-methylglycine, 20h); c) relative yields for regioisomeric bisadducts **3** and trisadduct **4-t3,t3,t3** (red) for **A0** (black) and **B2** (blue); HPLC chromatograms (UV/Vis detection at  $\lambda = 310$  nm) for d) **A2**, e) **B2** and f) comparison of bisadduct region for **A2** and **B2**.

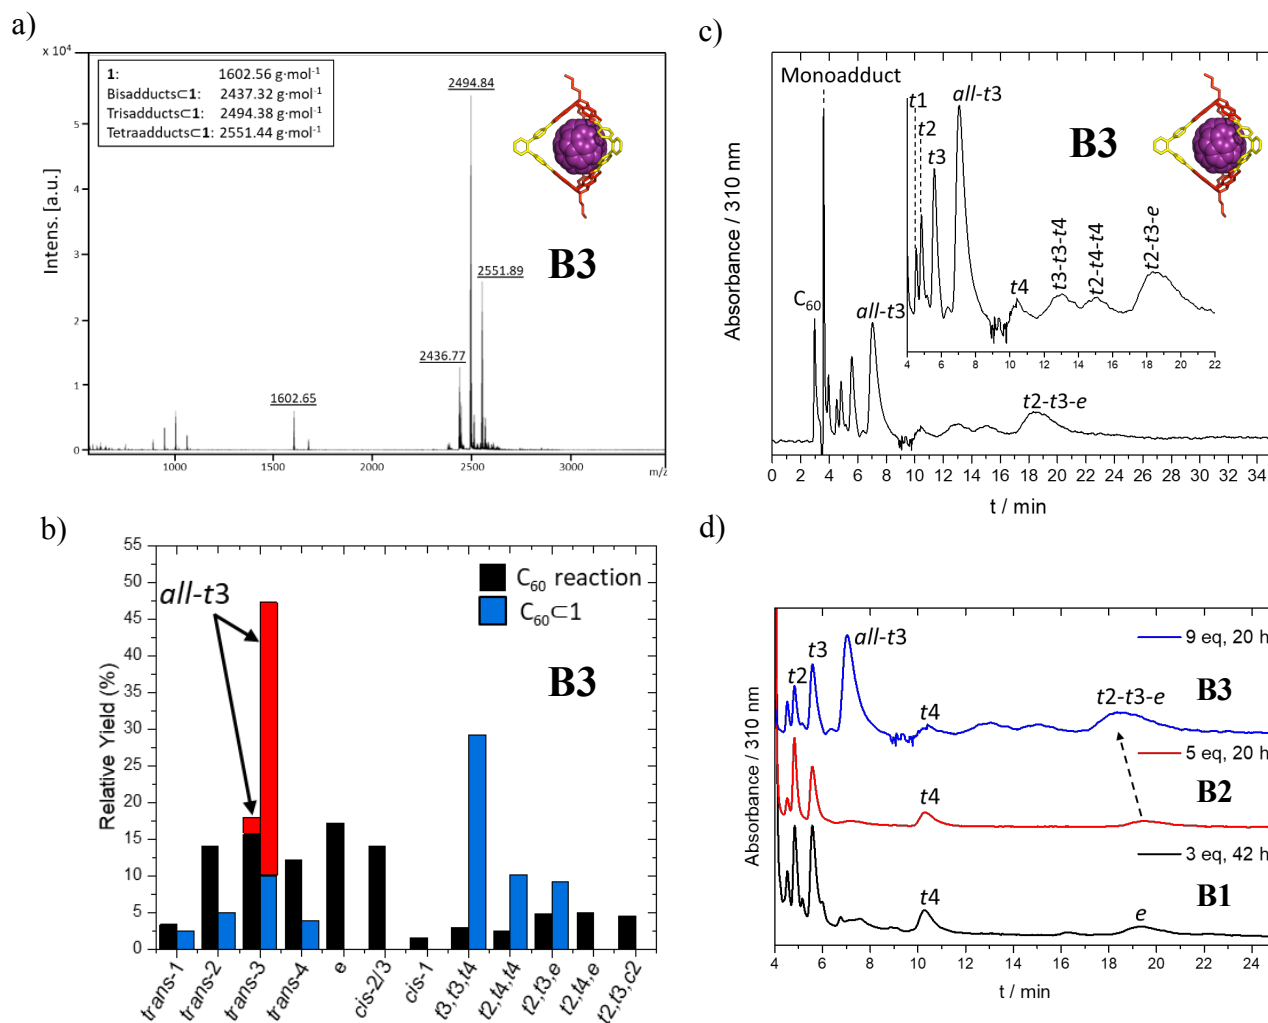

**Fig. S15.** a) MALDI-TOF MS (DCTB, CHCl<sub>3</sub>) for cage reaction **B3** (C<sub>60</sub><1, 9 eq. *N*-methylglycine, 20h); b) relative yields for regioisomeric bisadducts **3** and trisadduct **4-t3,t3,t3** (red) for **A0** (black) and **B3** (blue); HPLC chromatograms (UV/Vis detection at λ = 310 nm) for c) **B3** and d) comparison of bisadduct region for **B1** (black, 3 eq., 48h), **B2** (red, 5 eq., 20h) and **B3** (blue, 9 eq., 20h).

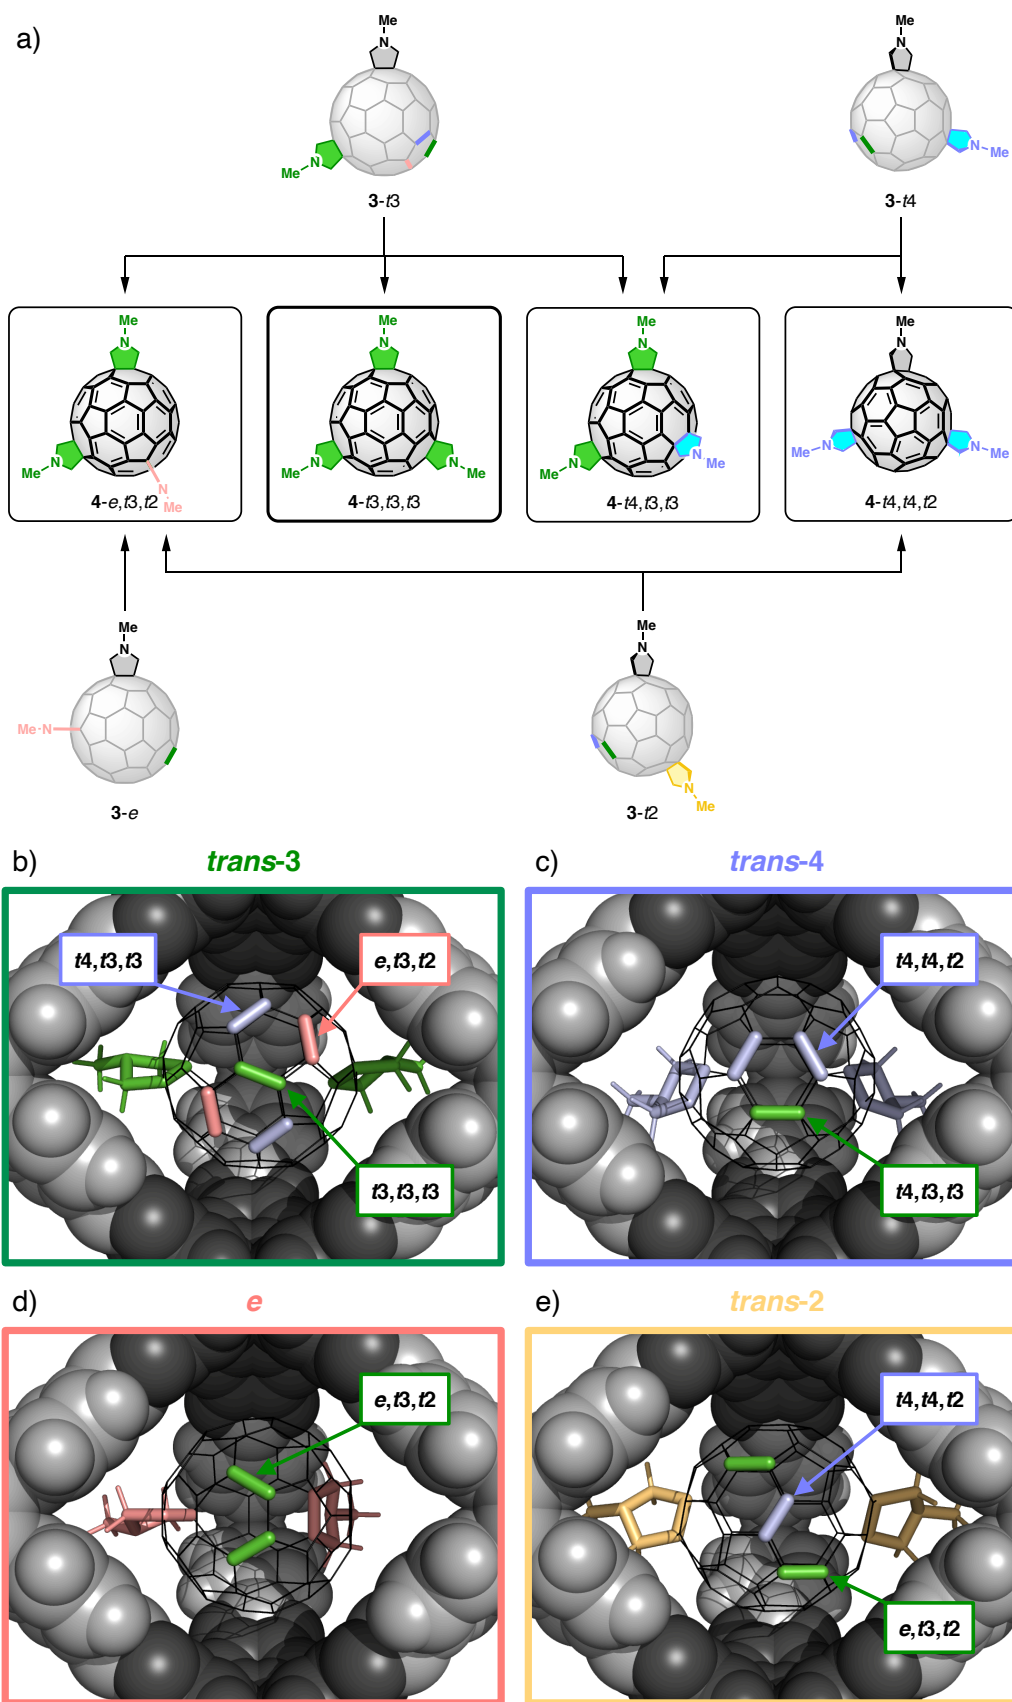

**Fig. S16.** a) Synthesis of specific regioisomeric trisadducts **4** from *trans*- and *e*-bisadducts **3** and illustration of accessible double bonds in cage-templated syntheses of trisadducts **4** from bisadduct complexes b)  $3-t_3 \subset 1$ , c)  $3-t_4 \subset 1$ , d)  $3-e \subset 1$  and e)  $3-t_2 \subset 1$ .

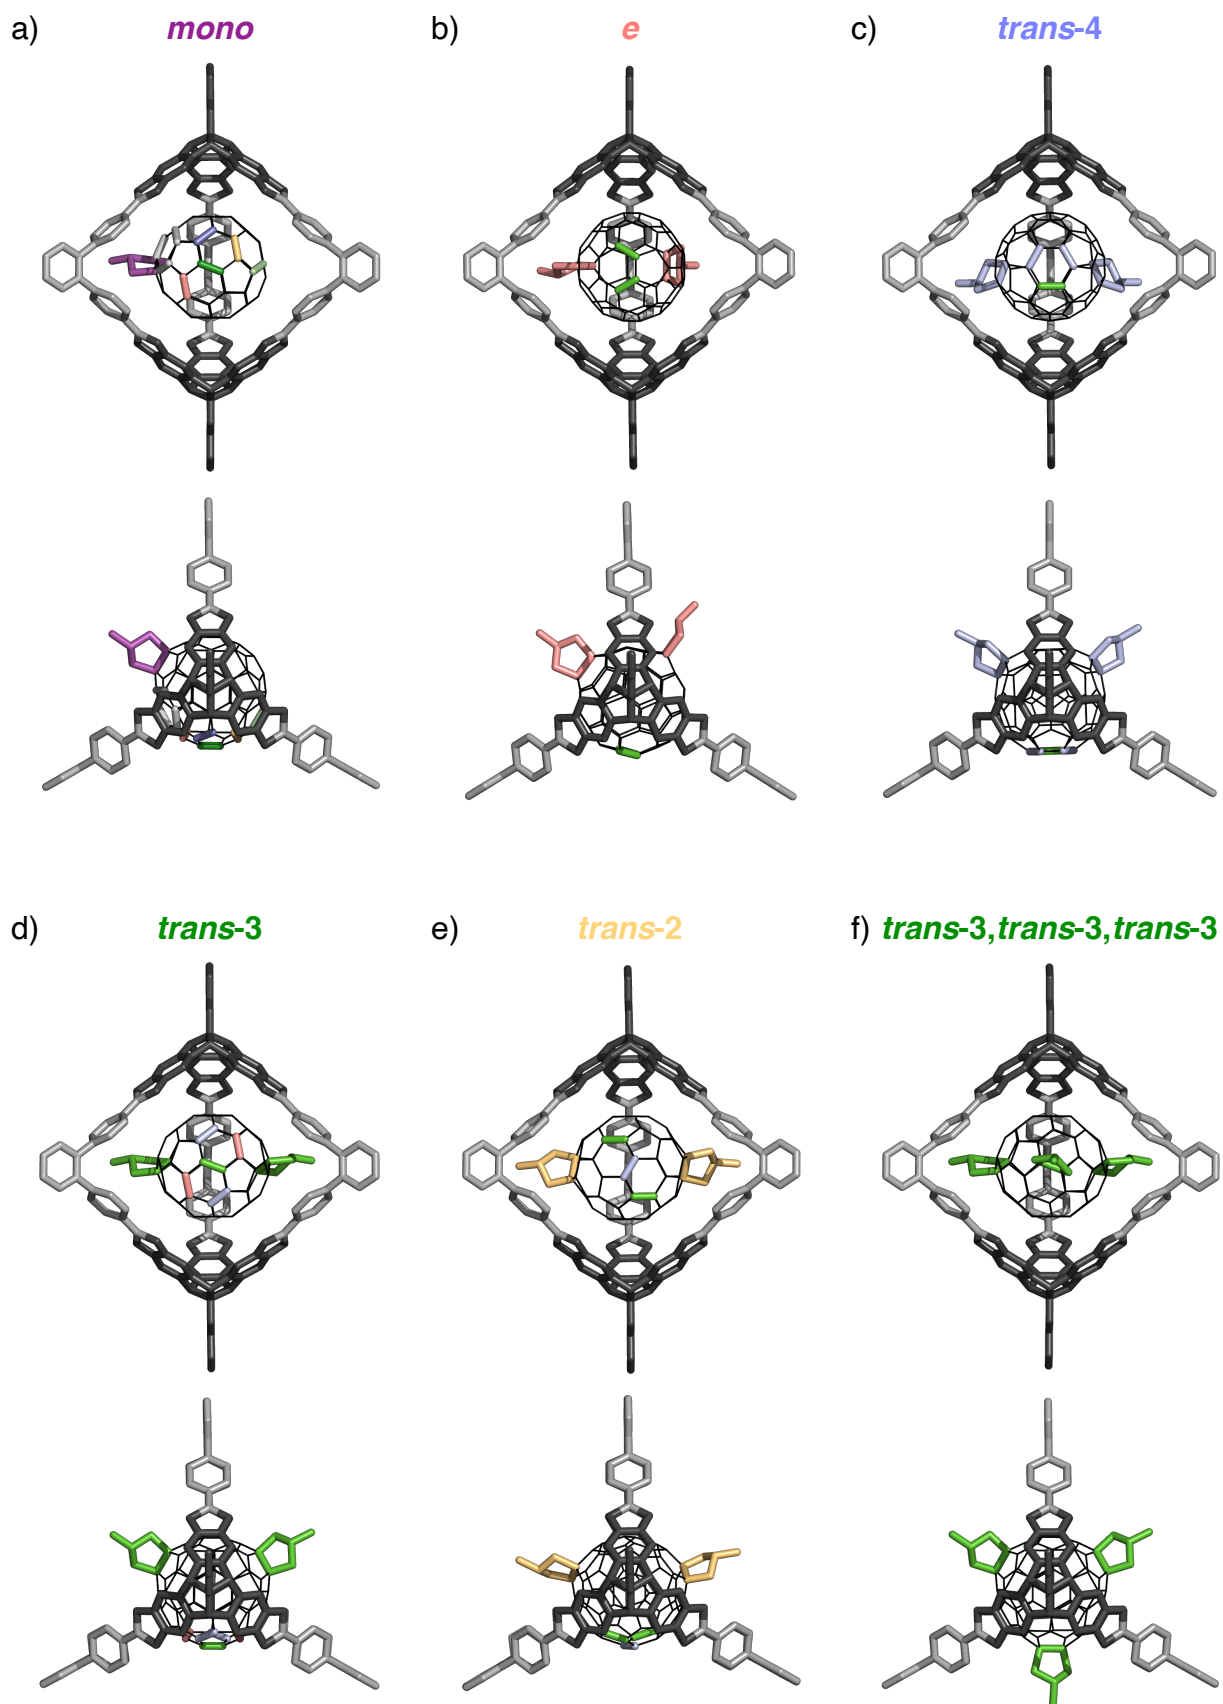

**Fig. S17.** Front and top views for structural models of a)  $2\subset 1$  (mono), b)  $3-e\subset 1$ , c)  $3-t_4\subset 1$ , d)  $3-t_3\subset 1$ , e)  $3-t_2\subset 1$  and f)  $4-t_3,t_3,t_3\subset 1$ .



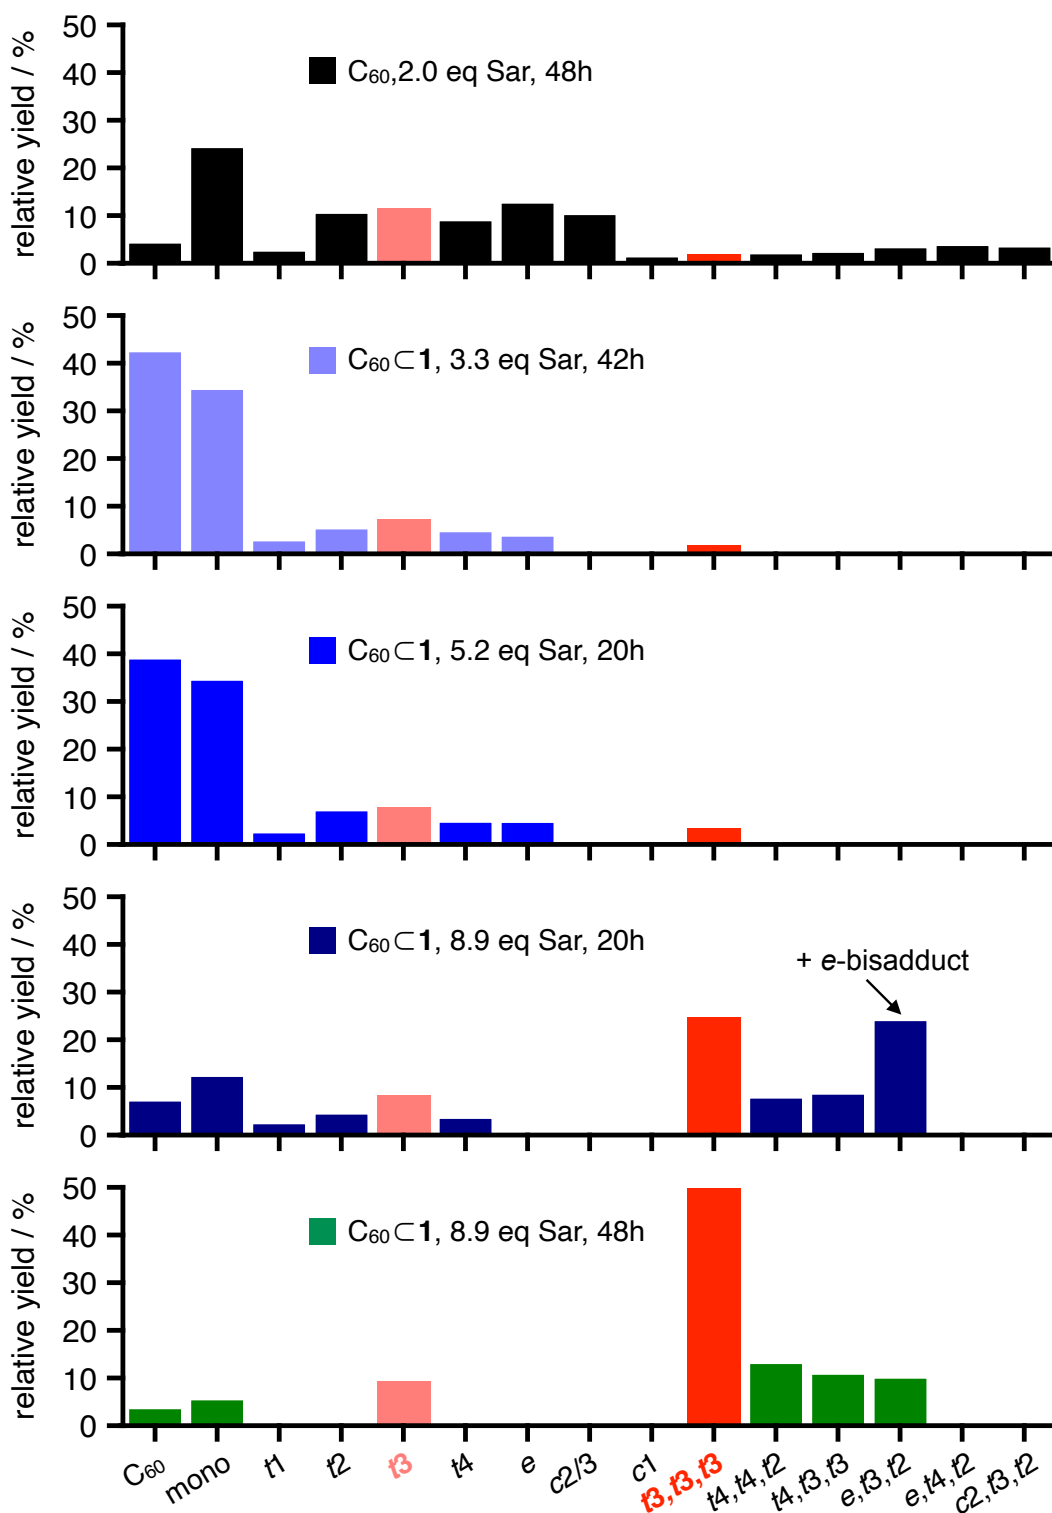

**Fig. S18.** Relative yields for C<sub>60</sub>, monoadduct **2**, bisadducts **3** and trisadducts **4** control experiment with C<sub>60</sub> (2.0 eq Sar, 8h, black, top) and cage-templated reactions with C<sub>60</sub>C<sub>1</sub> (blue, middle) and cage reaction on preparative scale (9 eq Sar, 48h, green, bottom); yields for **3-t3** and **4-t3,t3,t3** are indicated in light red and red, respectively.

## Synthesis of *N*-methylfulleropyrrolidine bis- and trisadducts on preparative scale:

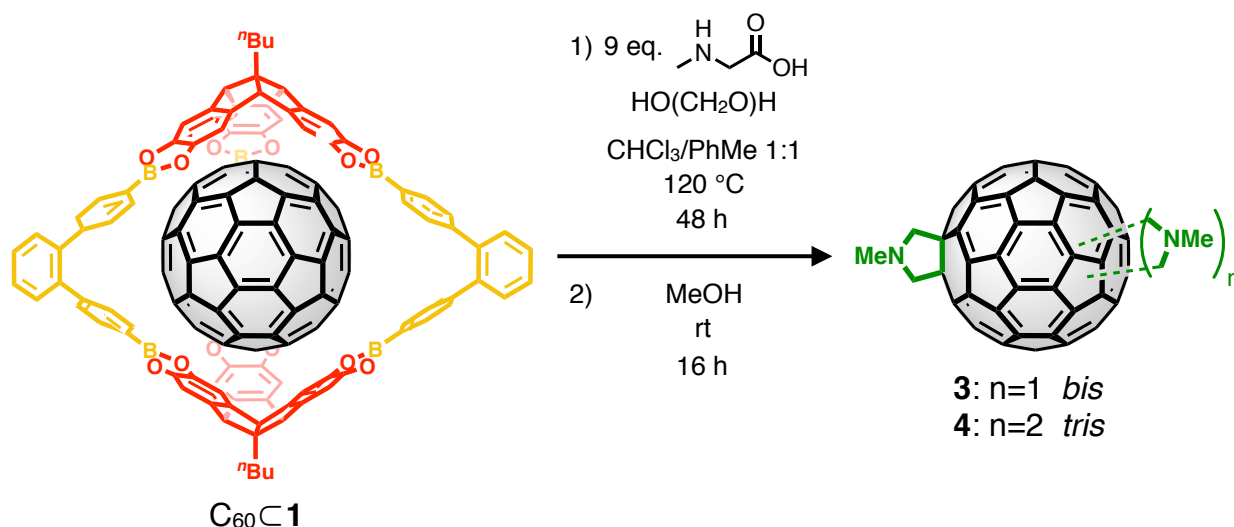

**Scheme S2.** Synthesis of *N*-methylfulleropyrrolidines.

$\text{C}_{60}$  (44.6 mg, 61.9  $\mu\text{mol}$ , 1 eq.) was added to a solution of **1** (121 mg, 75.6  $\mu\text{mol}$ , 1.2 equiv) in dry  $\text{CHCl}_3$  (150 mL) and stirred overnight at room temperature. Subsequently, the suspension was sonicated for four hours at room temperature. After filtration of insoluble residues, another 0.2 equivalents of **1** were added and the solution was diluted with dry toluene (150 mL). To the stock solution of  $\text{C}_{60}\text{C}1$ , paraformaldehyde (50.5 mg) and sarcosine (16.1 mg, 181  $\mu\text{mol}$ , 2.9 eq) were added and the reaction mixture was heated to reflux for eight hours. After the addition of more sarcosine (17.1 mg, 190  $\mu\text{mol}$ , 3.1 eq), the reaction mixture was refluxed again for 20 hours. Finally, one last portion of sarcosine (16.0 mg, 179  $\mu\text{mol}$ , 2.9 eq.) was added and the reaction mixture was refluxed for 20 hours. After removal of the solvent under reduced pressure, the residue was suspended in MeOH (100 mL), sonicated for 30 minutes and subsequently stirred overnight at room temperature. After removal of MeOH via evaporation, the crude product was dried in high vacuum and purified by automated flash chromatography with PhMe and PhMe/EtOAc 95:5 as eluents. Five fractions were isolated and analyzed and identified by mass spectrometry and comparison of UV/Vis absorption spectra to literature data.<sup>S9, S10</sup>

Bisadduct **3-*t3***: 1.2 mg (1.44  $\mu\text{mol}$ , 2.3%);  $^1\text{H NMR}$  (400 Mz,  $\text{CDCl}_3$ ):  $\delta$  4.38 (d,  $J = 9.3$  Hz, 2H), 4.31 (d,  $J = 9.3$  Hz, 2H), 4.14 (d,  $J = 9.1$  Hz, 2H), 4.05 (d,  $J = 9.4$  Hz, 2H), 2.91 (s, 6H), **MS** (MALDI-TOF, DCTB in  $\text{CHCl}_3$ ):  $m/z = 833.13$  [ $\text{M}$ ]<sup>+</sup>; **UV/Vis** ( $\text{CH}_2\text{Cl}_2$ , rt):  $\lambda_{\text{max}} = 412$  (sh), 462, 487 (sh), 639 nm.

Trisadduct **4-*t3,t3,t3***: 3.4 mg (3.81  $\mu\text{mol}$ , 6.1 %);  $^1\text{H NMR}$  (400 Mz,  $\text{CDCl}_3$ ):  $\delta$  3.96 (s, 12H), 2.78 (s, 9H), **MS** (MALDI-TOF, DCTB in  $\text{CHCl}_3$ ):  $m/z = 891.13$  [ $\text{M}$ ]<sup>+</sup>; **UV/Vis** ( $\text{CH}_2\text{Cl}_2$ , rt):  $\lambda_{\text{max}} = 440$ , 494, 538 nm.

Trisadduct **4-*t4,t4,t2***: 0.5 mg, (0.56  $\mu\text{mol}$ , 0.9 %). This fraction was not obtained as a pure compound after one run of automated flash chromatography. Due to the very small amount, further purifications were not feasible and the addition pattern was assigned based on comparison of the order of elution with previous literature reports.<sup>S8</sup>

Trisadduct **4-*t4,t4,t3***: 1.4 mg (1.57  $\mu\text{mol}$ , 5.5%); **MS** (MALDI-TOF, DCTB in  $\text{CHCl}_3$ ):  $m/z = 890.12$  [ $\text{M}$ ]<sup>+</sup>; **UV/Vis** ( $\text{CH}_2\text{Cl}_2$ , rt):  $\lambda_{\text{max}} = 478$ , 530, 573 nm.

Trisadduct **4-*e,t3,t2***: 3.5 mg (3.92  $\mu\text{mol}$ , 6.3%); **MS** (MALDI-TOF, DCTB in  $\text{CHCl}_3$ ):  $m/z = 890.11$  [ $\text{M}$ ]<sup>+</sup>; **UV/Vis** ( $\text{CH}_2\text{Cl}_2$ , rt):  $\lambda_{\text{max}} = 466$ , 544, 650 nm.

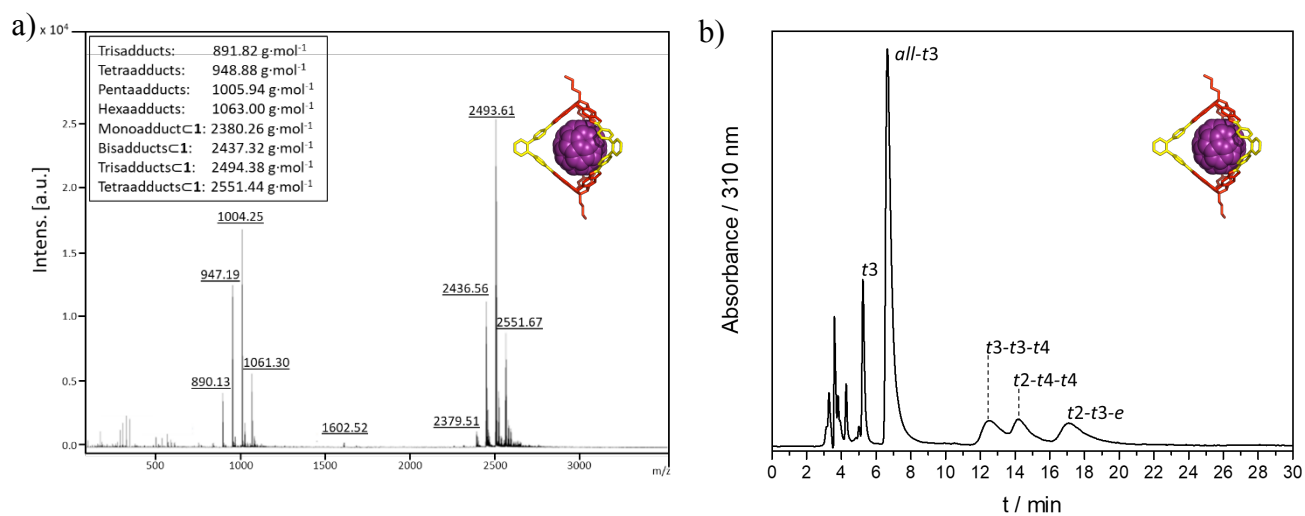

**Fig. S19.** Monitoring of reaction progress for reaction of  $C_{60}\subset$ 1 with 9 equivalents of *N*-methylglycine on a preparative scale: a) MALDI-TOF MS (DCTB,  $CHCl_3$ ) and b) HPLC chromatogram for crude reaction product after 48 hours.

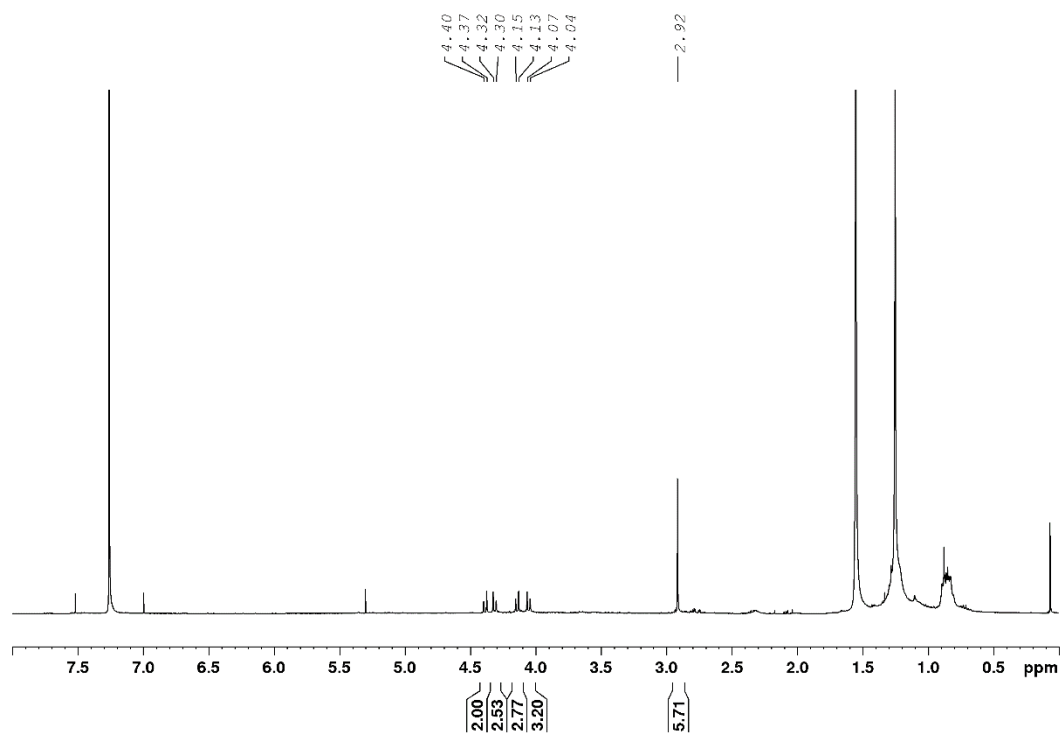

**Fig. S20.**  $^1H$ -NMR spectra (400 MHz,  $CDCl_3$ , rt) for bisadduct **3-t3** after isolation by automated flash chromatography.

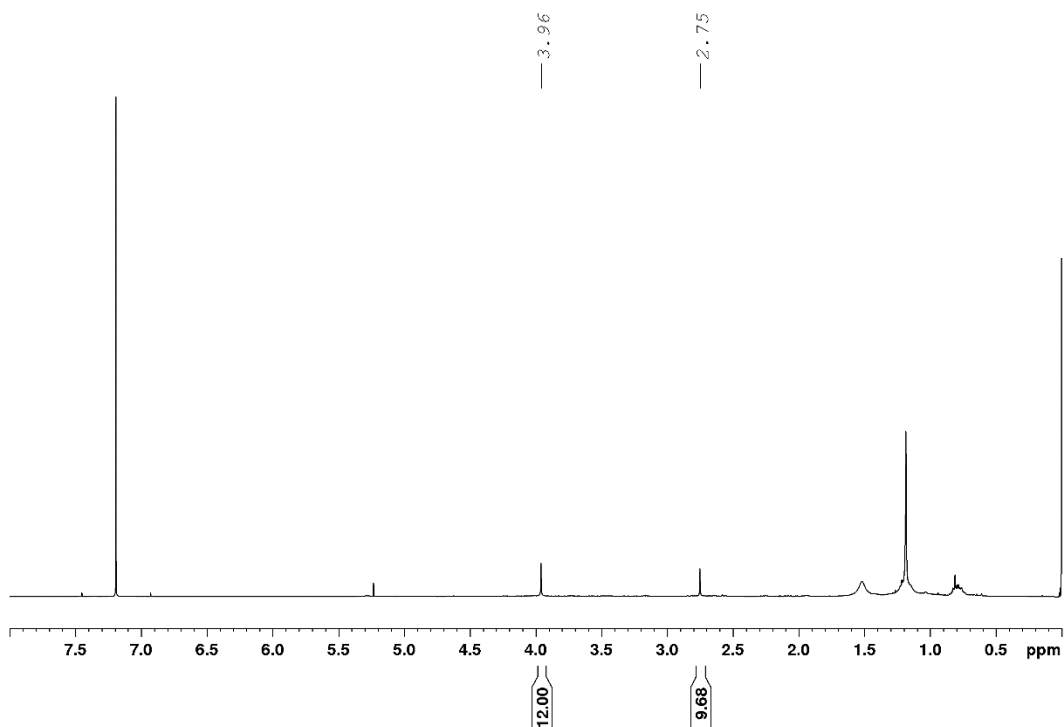

**Fig. S21.**  $^1\text{H-NMR}$  spectrum (400 MHz,  $\text{CDCl}_3$ , rt) of trisadduct **4-*t*3,*t*3,*t*3** after isolation by automated flash chromatography.

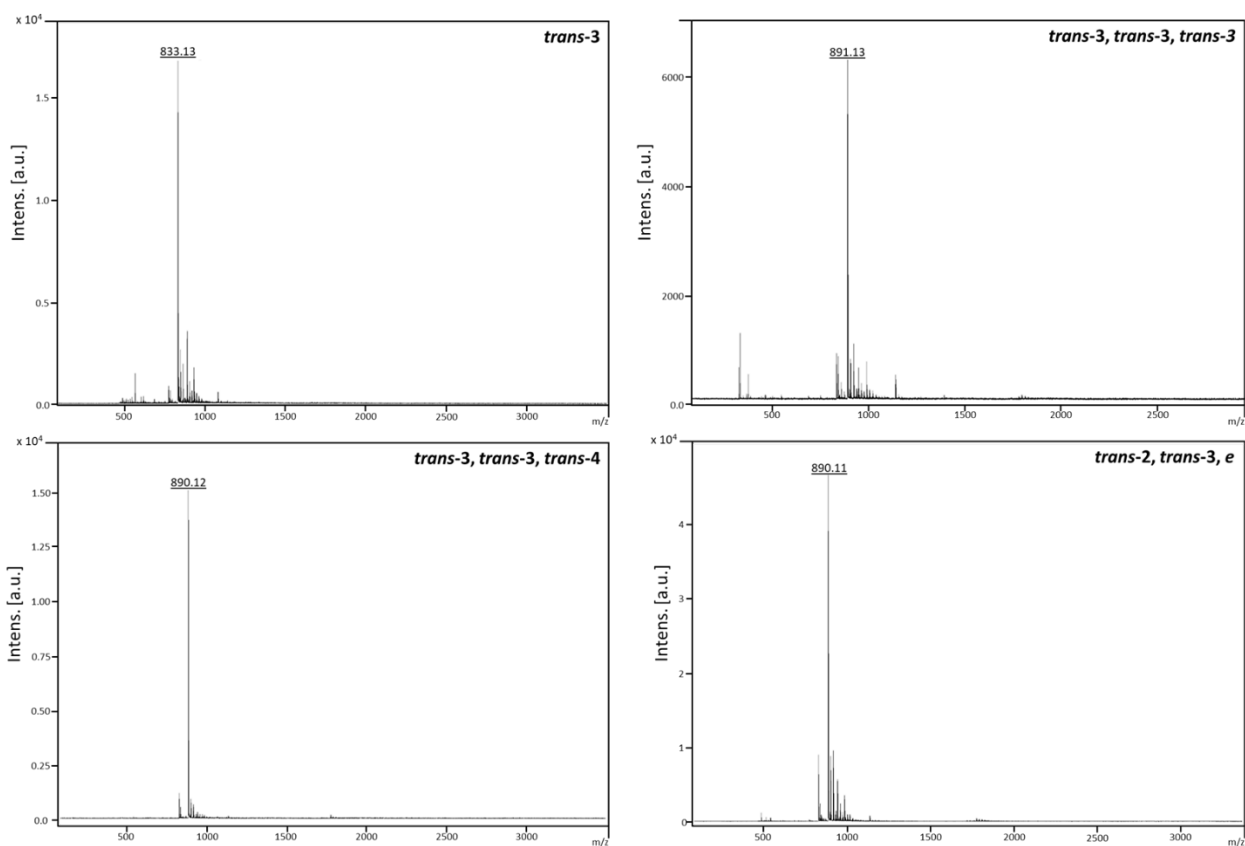

**Fig. S22.** Mass spectra (MALDI-TOF, DCTB,  $\text{CHCl}_3$ ) for bis- and trisadducts after isolation by automated flash chromatography.

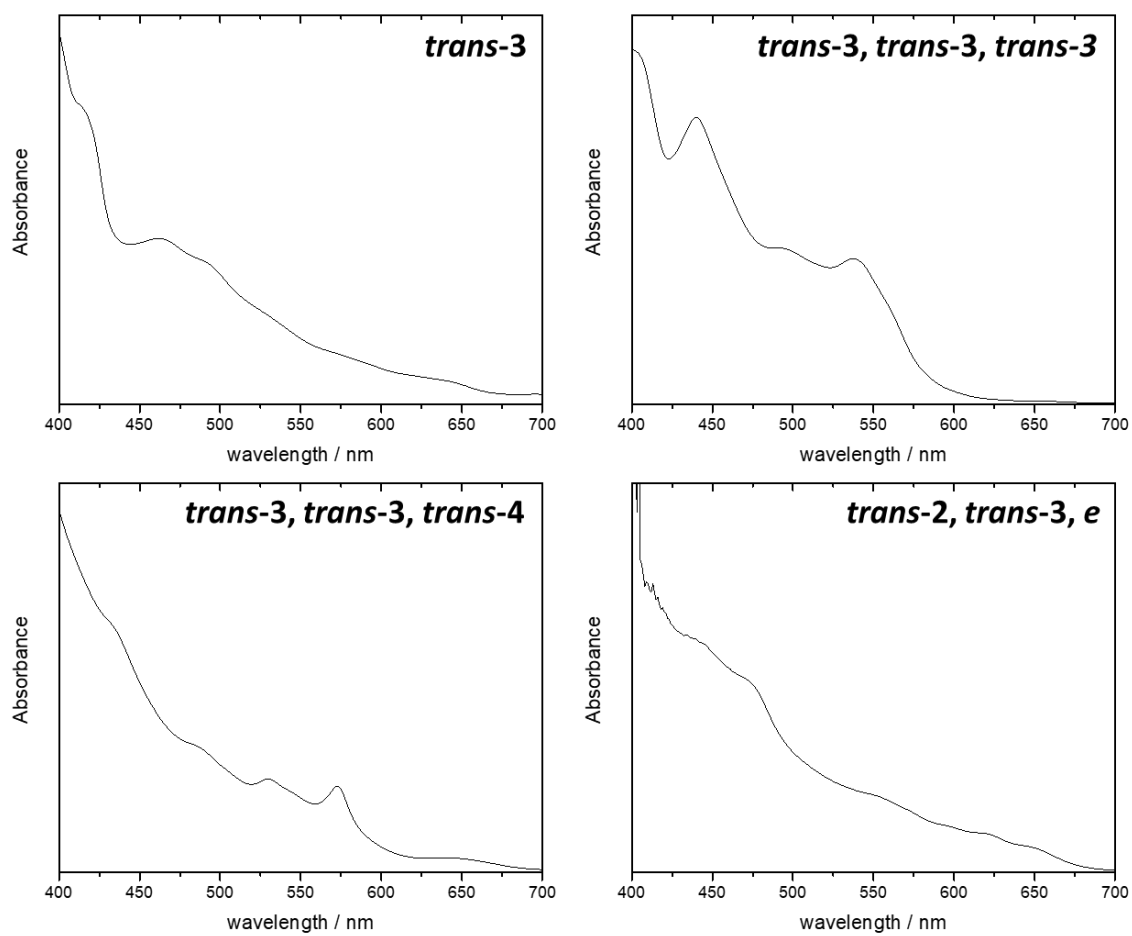

**Fig. S23.** UV/Vis absorption spectra ( $\text{CH}_2\text{Cl}_2$ , rt) for bis- and trisadducts after isolation by automated flash chromatography. Spectra are in accordance with literature data.<sup>S8–S10</sup>

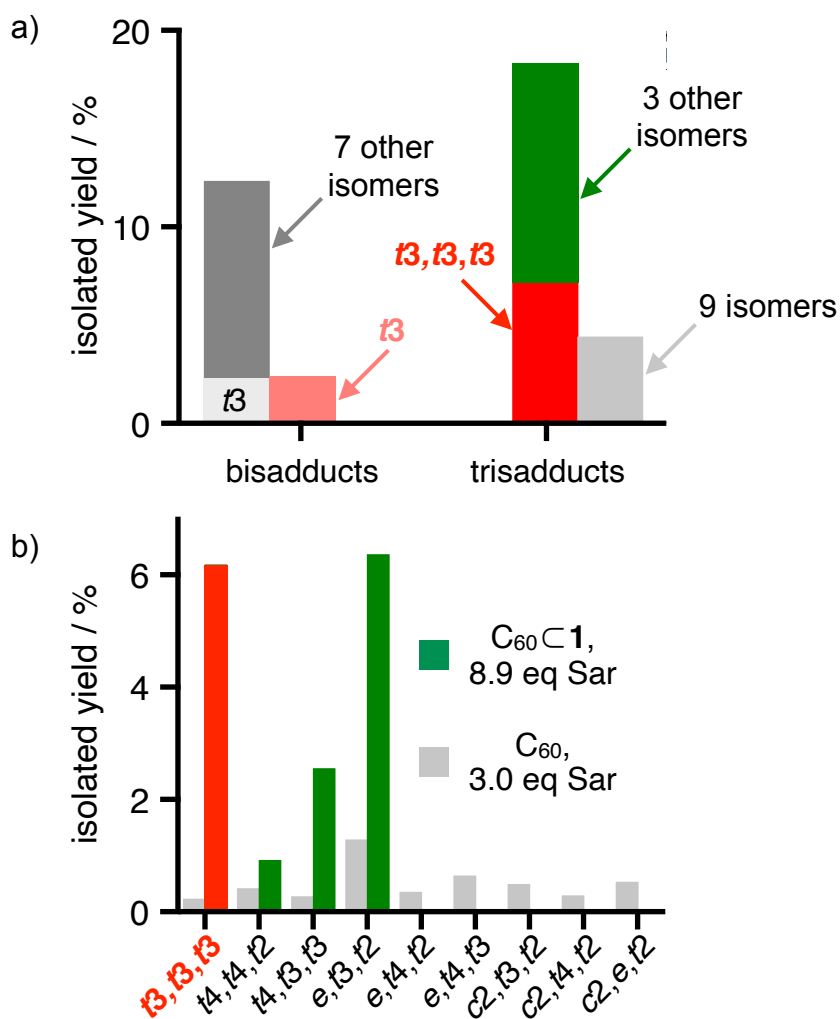

**Fig. S24.** a) Combined isolated yields for bis- and trisadducts for control reactions starting from C<sub>60</sub> (grey)<sup>S8</sup> and cage-templated reaction starting from C<sub>60</sub>C<sub>1</sub> (green) and b) isolated yields for pure regioisomeric trisadducts (yields for 3-*t3* and 4-*t3,t3,t3* are indicated in light red and red, respectively).

## 8 References

- S1 S. Klotzbach, T. Scherpf and F. Beuerle, *Chem. Commun.*, 2014, **50**, 12454–12457.
- S2 S. Klotzbach and F. Beuerle, *Angew. Chem. Int. Ed.*, 2015, **54**, 10356–10360.
- S3 *Topspin 3.0*. Bruker, <http://www.bruker.com>.
- S4 *Spartan '18*. Wavefunction, Inc., Irvine, CA, USA.
- S5 *OriginPro, Version 2015*. Origin Lab Corporation, Northampton, MA, USA.
- S6 G. Sheldrick, *Acta Crystallogr. Sect. A*, 2008, **64**, 112–122.
- S7 a) P. Van der Sluis and A. L. Spek, *Acta Crystallogr. Sect. A*, 1990, **46**, 194–201; b) A. L. Spek, *Acta Crystallogr. Sect. D*, 2009, **65**, 148–155.
- S8 S. Marchesan, T. Da Ros and M. Prato, *J. Org. Chem.*, 2005, **70**, 4706–4713.
- S9 G. Schick, M. Levitus, L. Kvetko, B. A. Johnson, I. Lamparth, R. Lunkwitz, B. Ma, S. I. Khan, M. A. Garcia-Garibay and Y. Rubin, *J. Am. Chem. Soc.*, 1999, **121**, 3246–3247
- S10 T. Nishimura, K. Tsuchiya, S. Ohsawa, K. Maeda, E. Yashima, Y. Nakamura and J. Nishimura, *J. Am. Chem. Soc.*, 2004, **126**, 11711–11717.
